# Supplementary material for: Design, Synthesis and Fungicidal Activity of N-(thiophen-2-yl) Nicotinamide Derivatives
Source: MDPI journal article supplement (doi:10.3390/molecules27248700), 2022-12-08

# **Supporting information**

## **Design, Synthesis and Fungicidal Activity of *N*-(thiophen-2-yl) Nicotinamide Derivatives**

Hongfei Wu, Xingxing Lu, Jingbo Xu, Xiaoming Zhang, Zhinian Li, Xinling Yang, \*,  
Yun Ling \*

# <sup>1</sup>H NMR SPECTRAL GRAPH

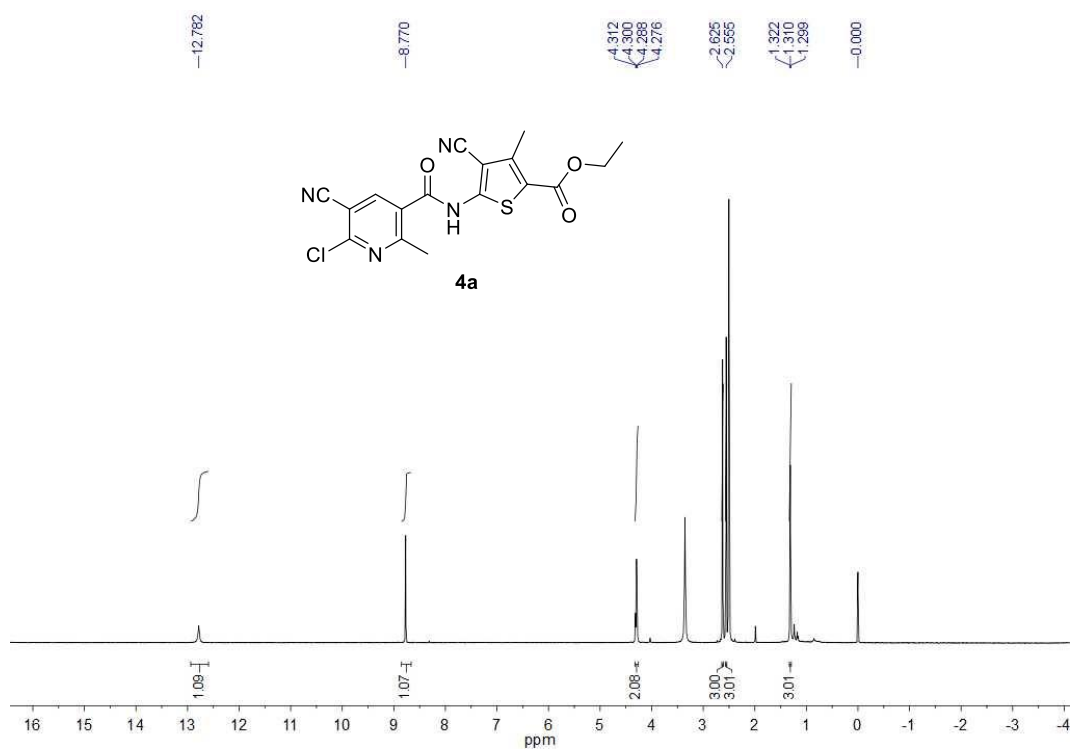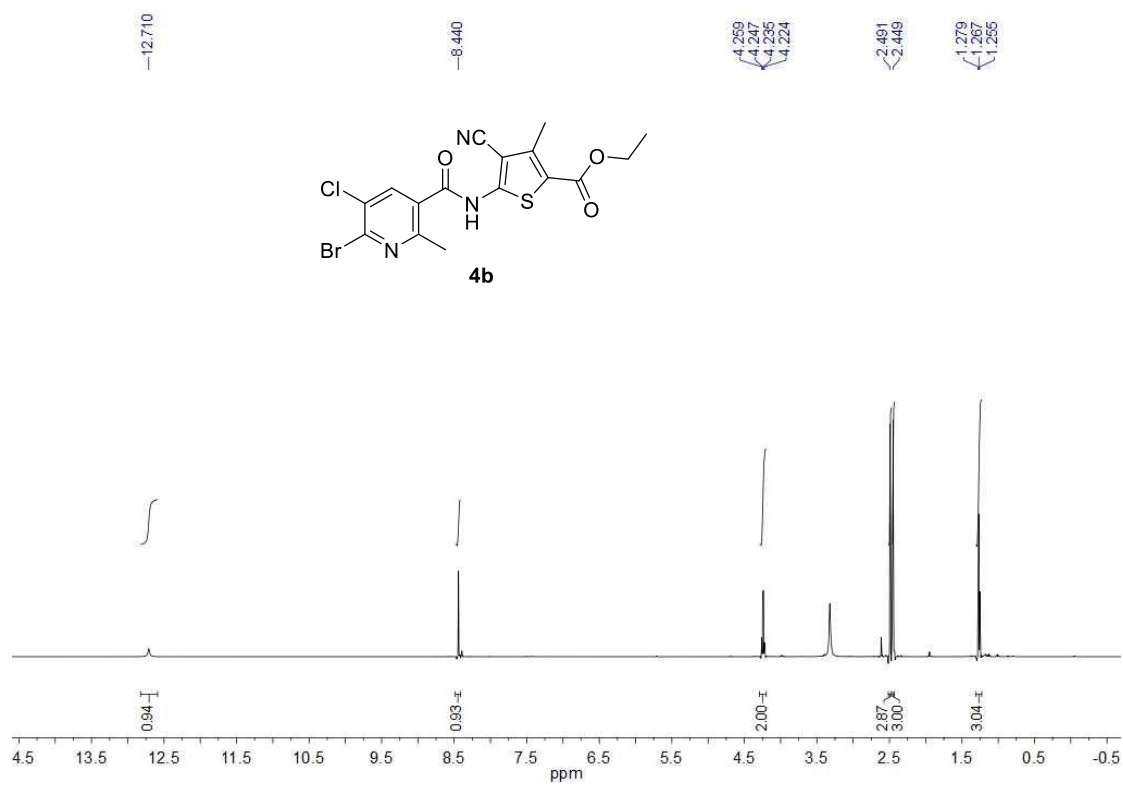

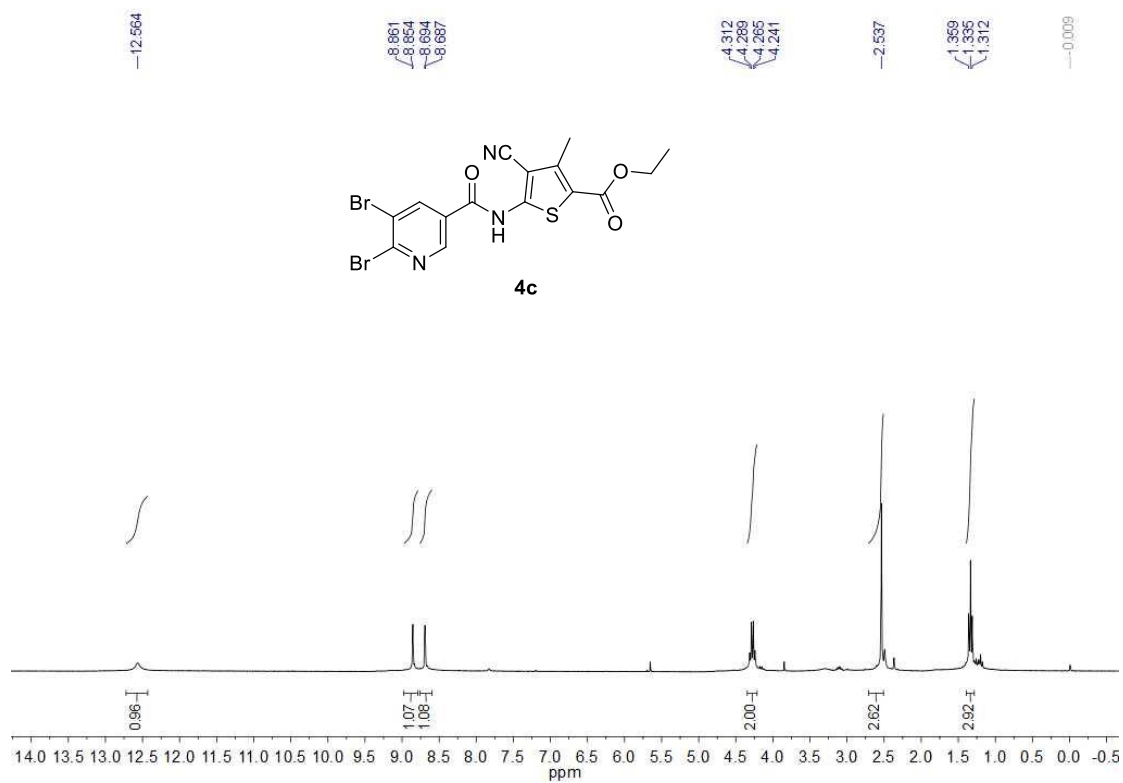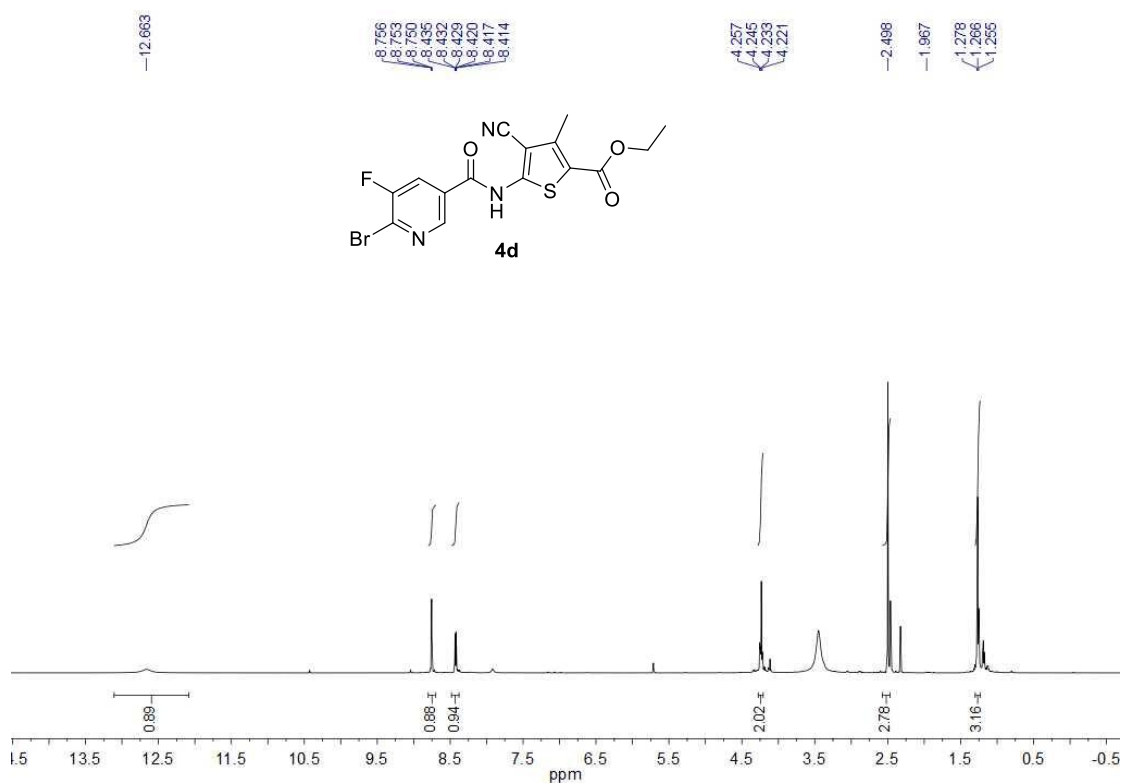

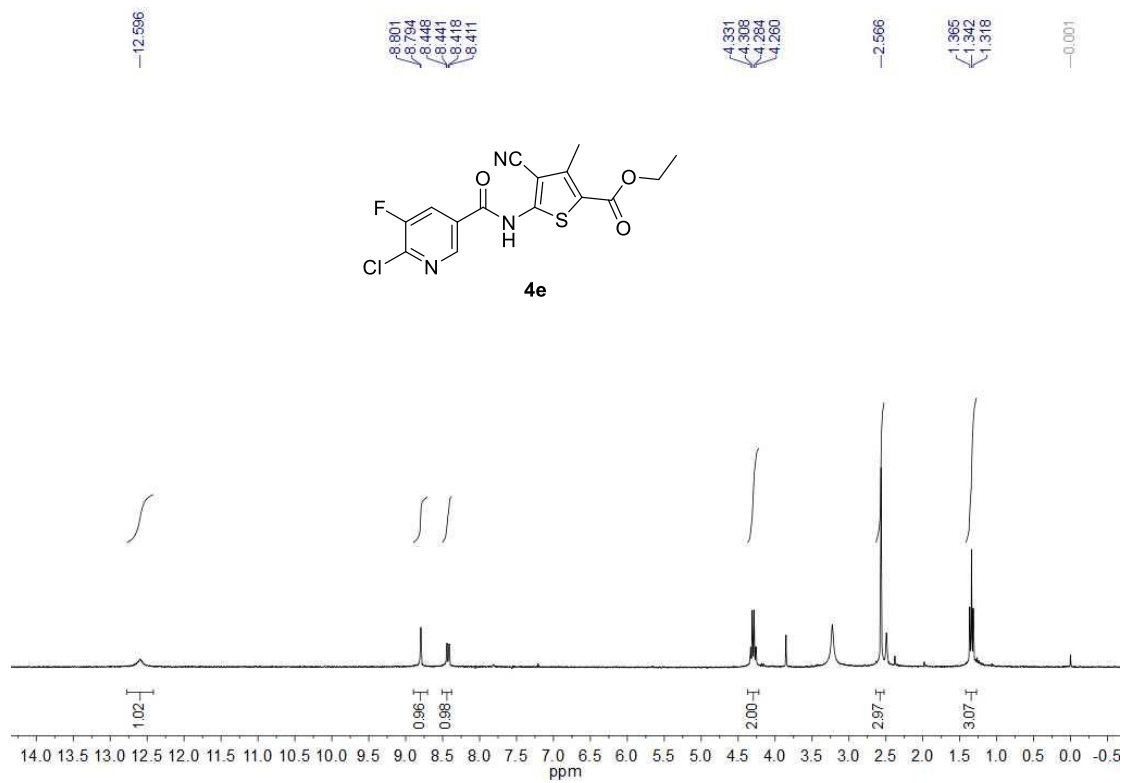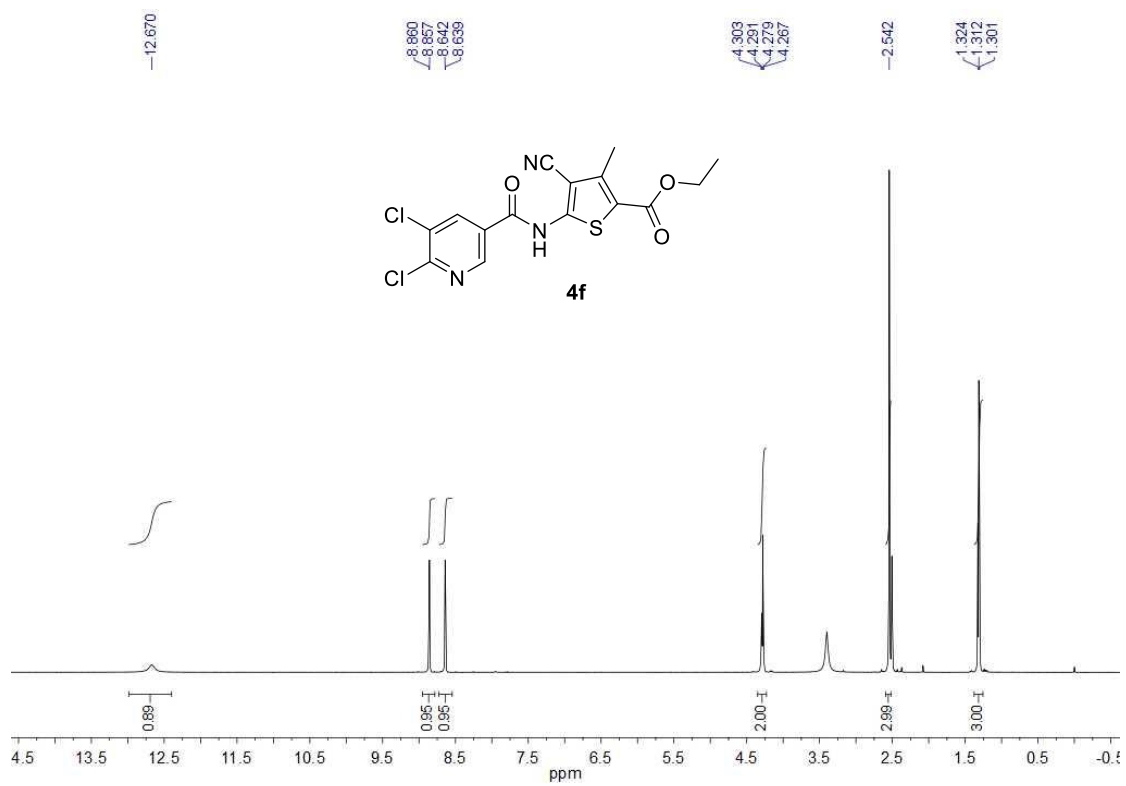

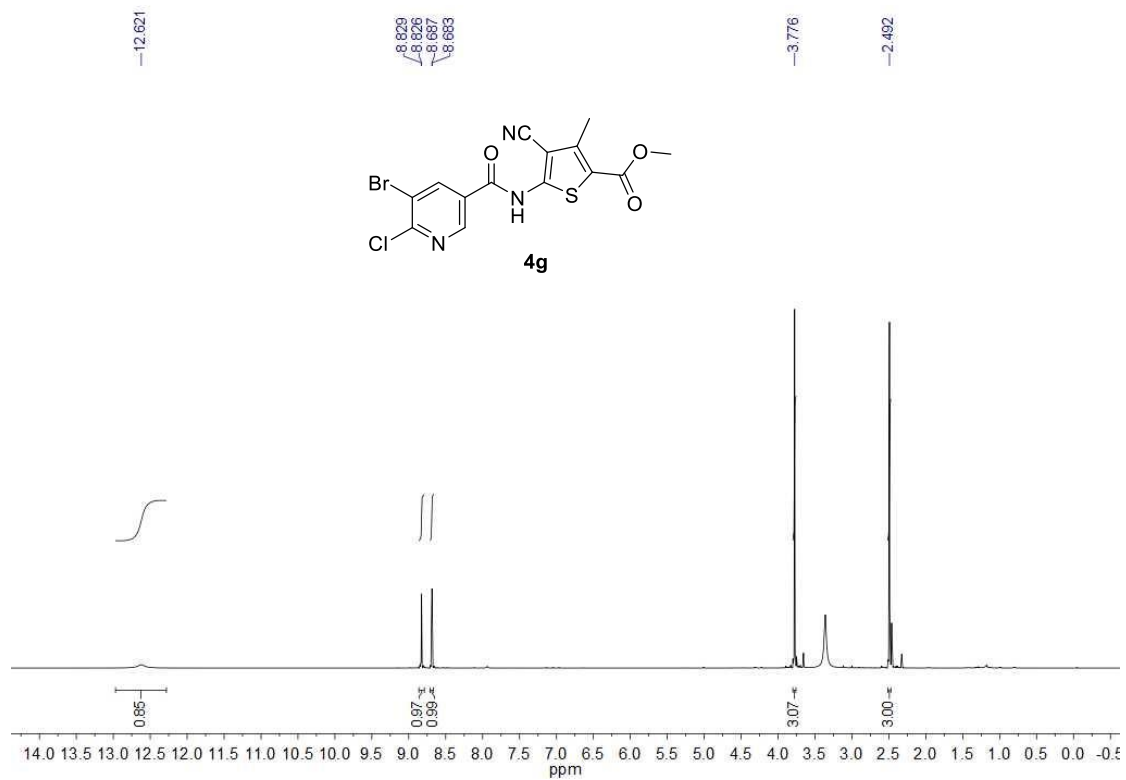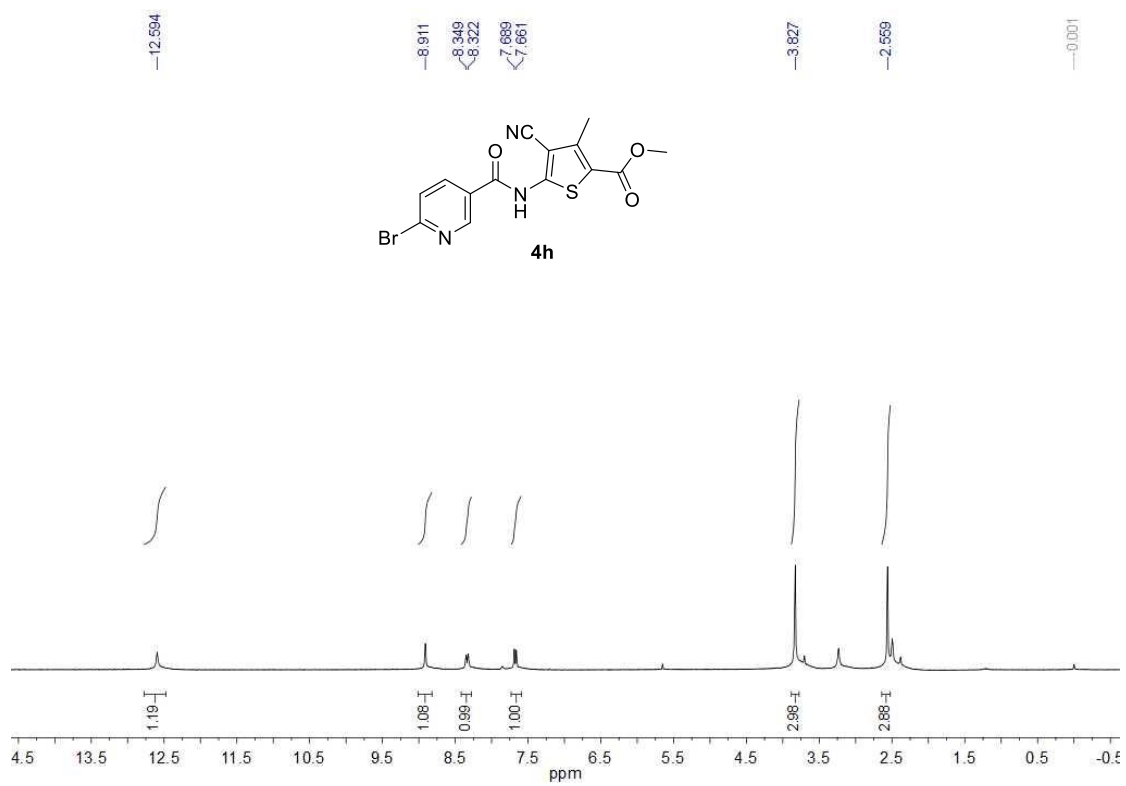

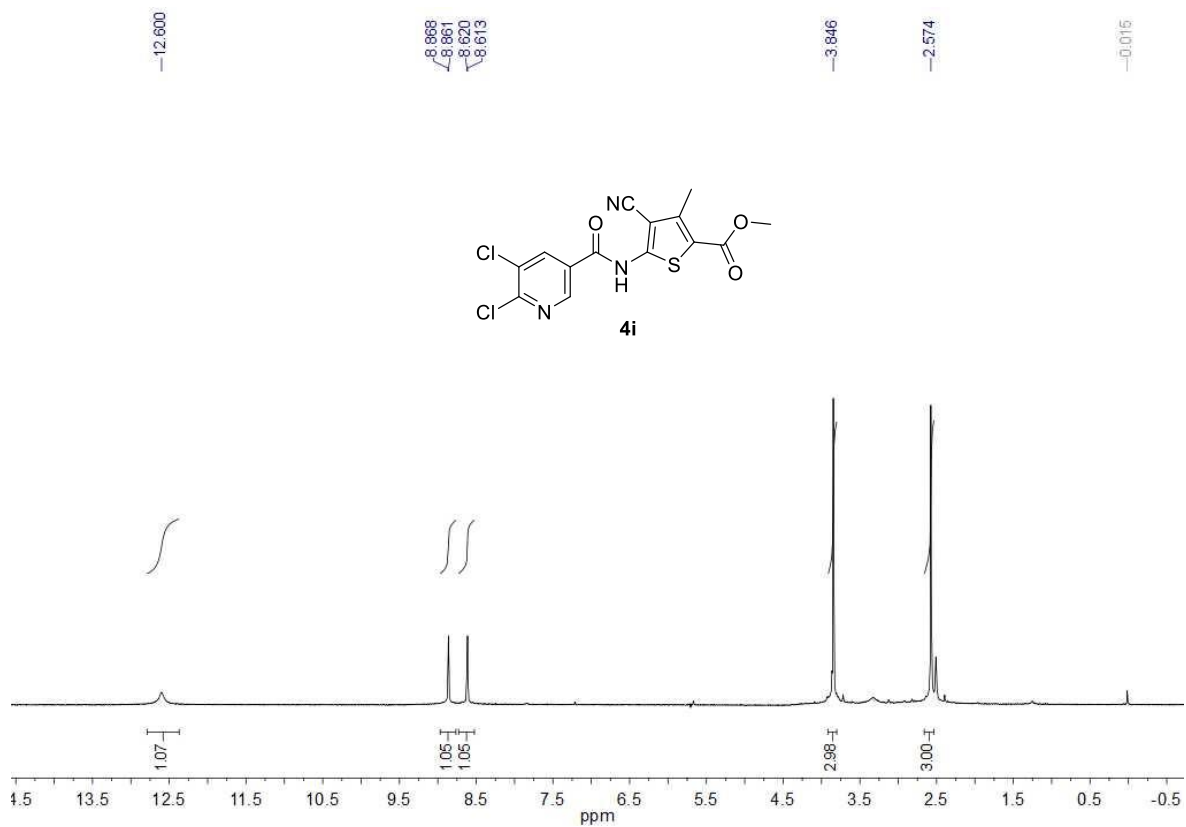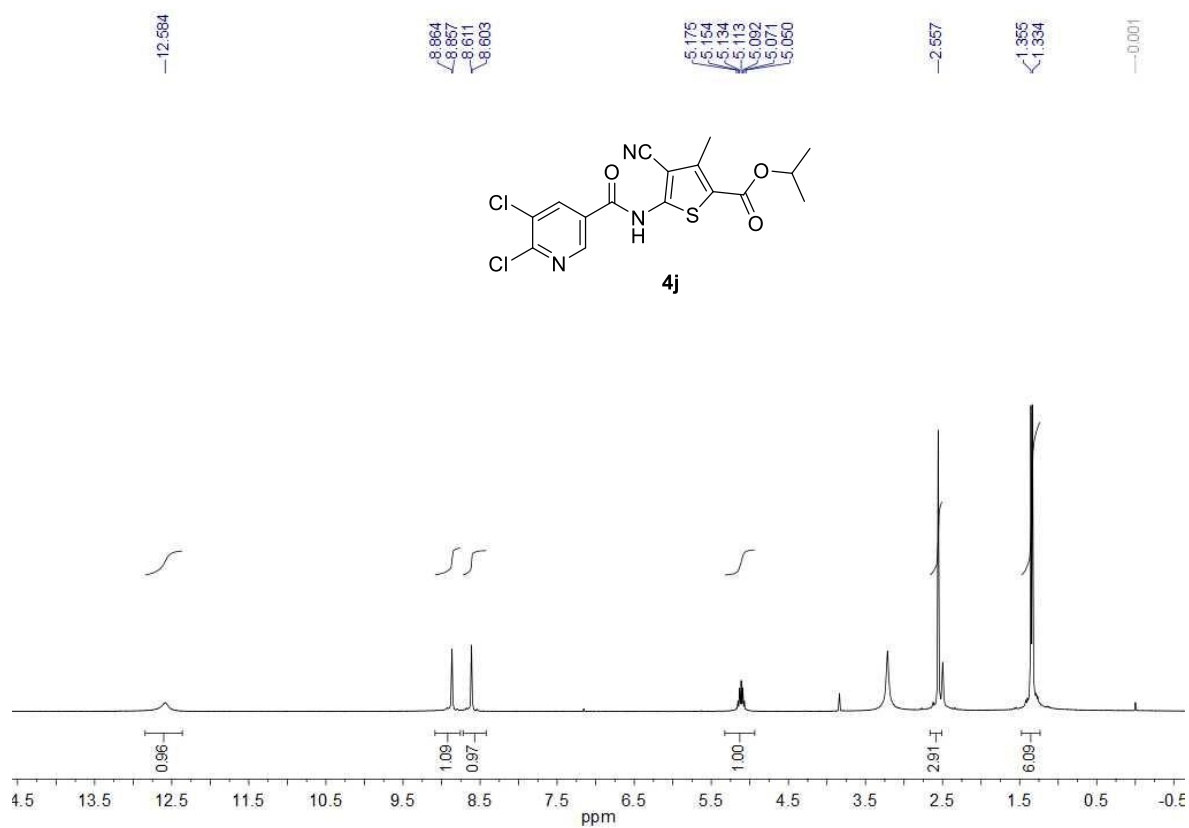

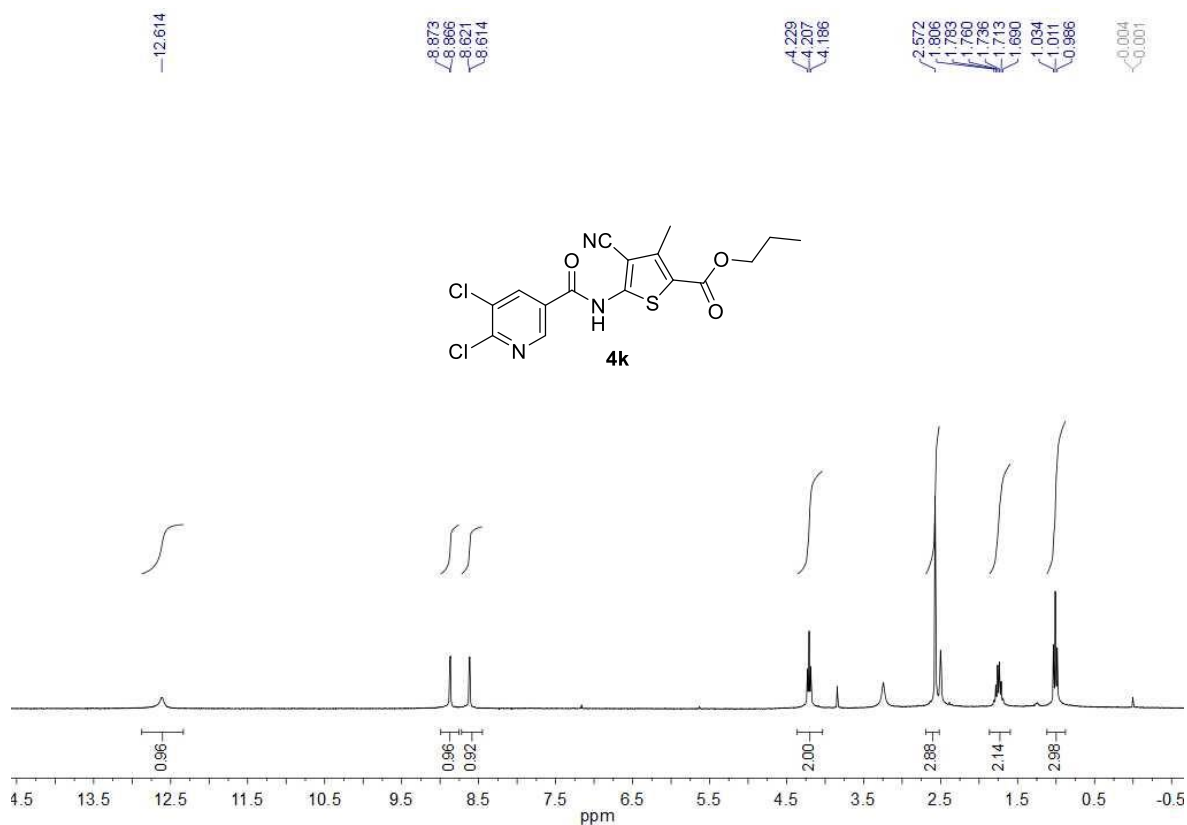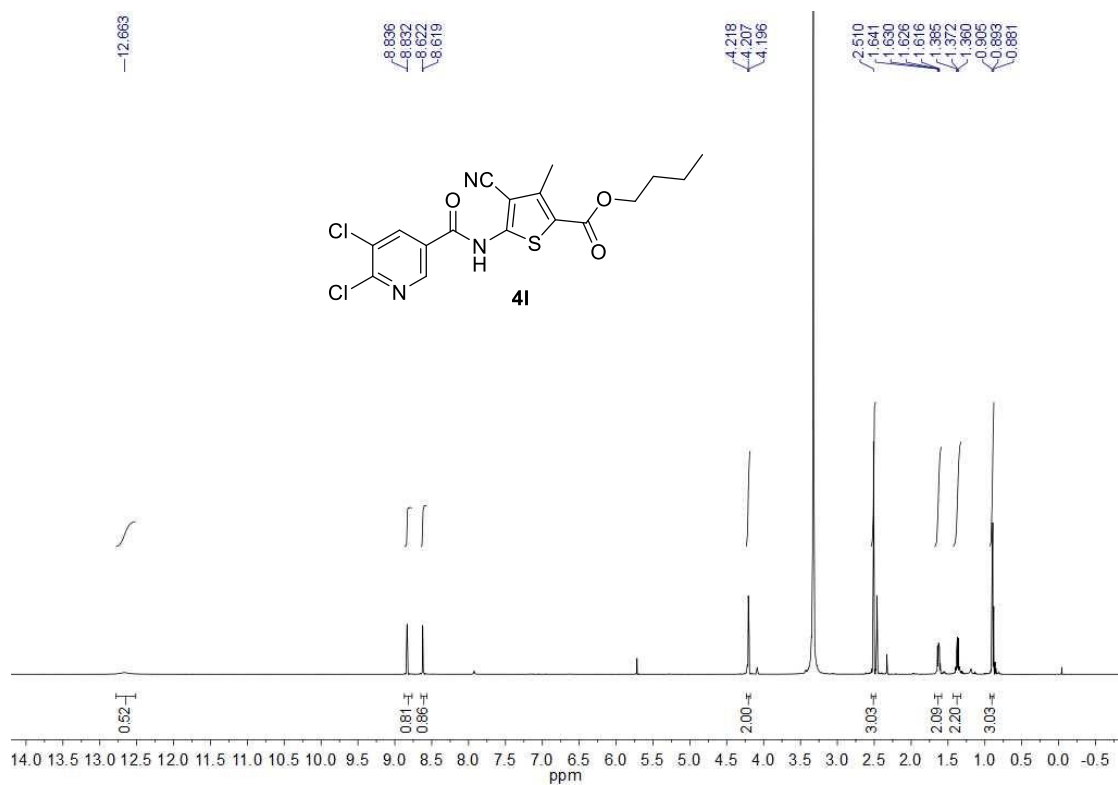

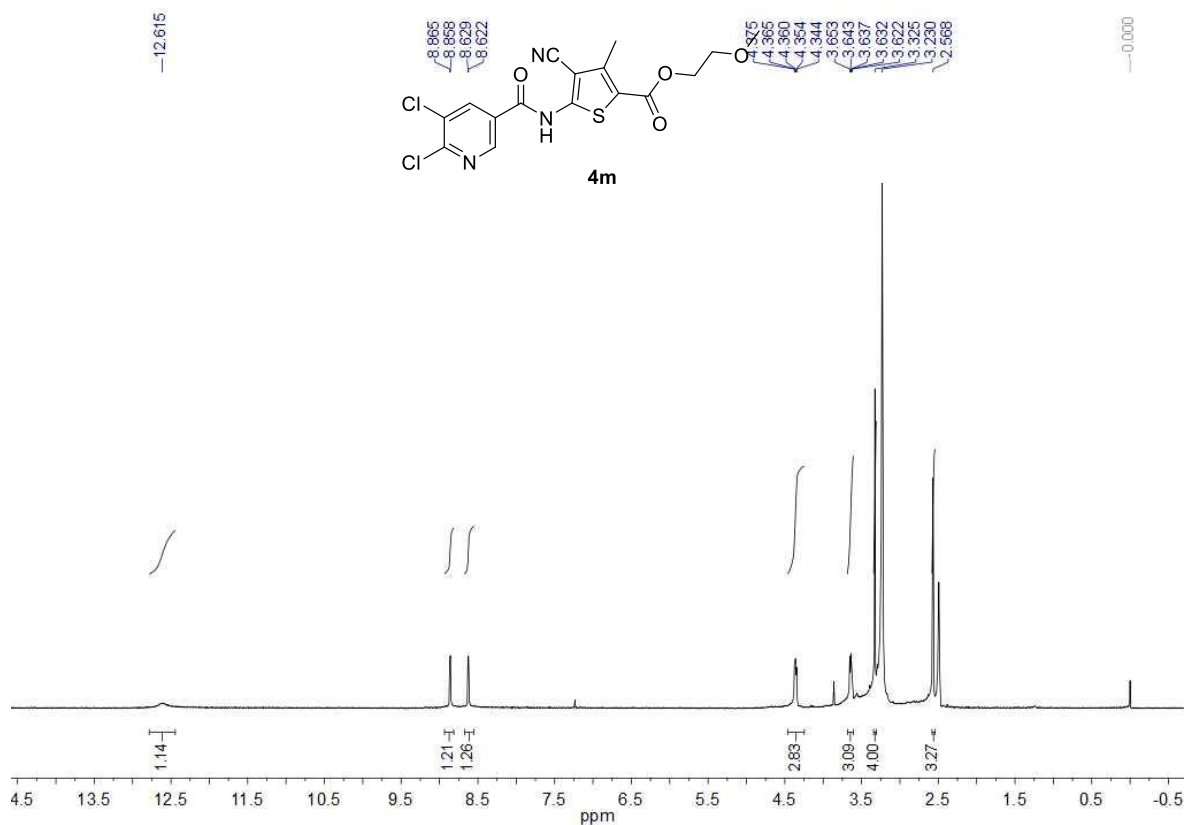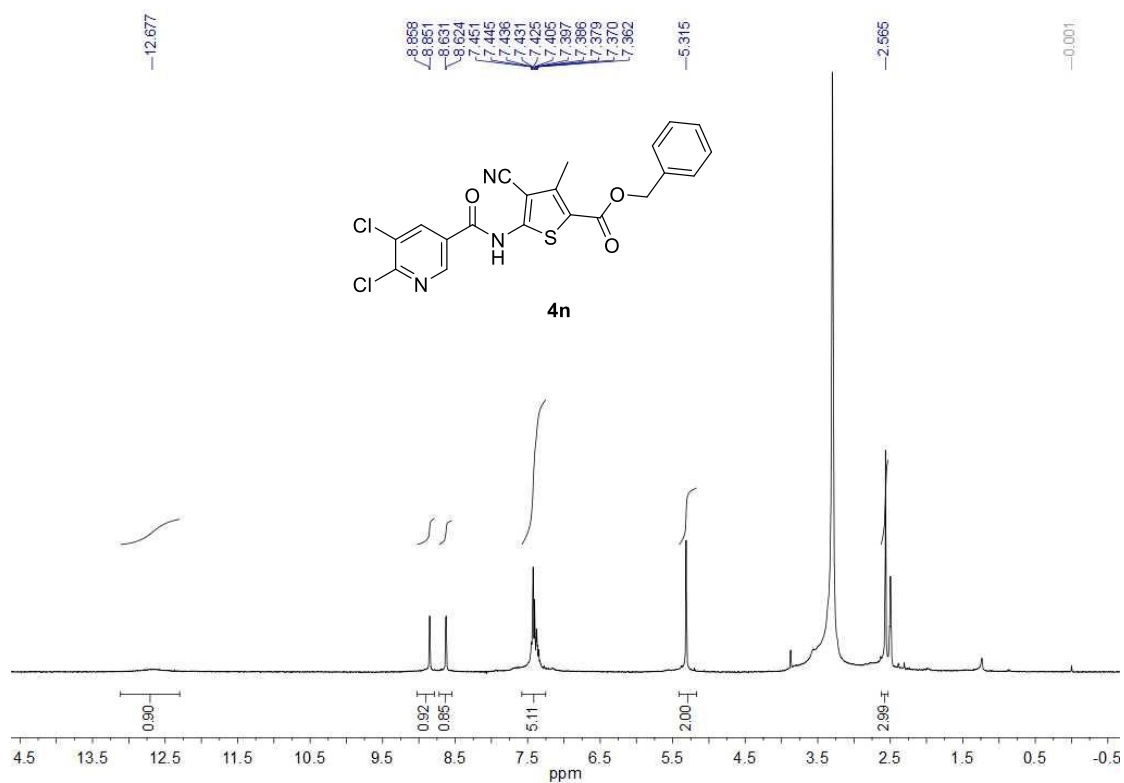



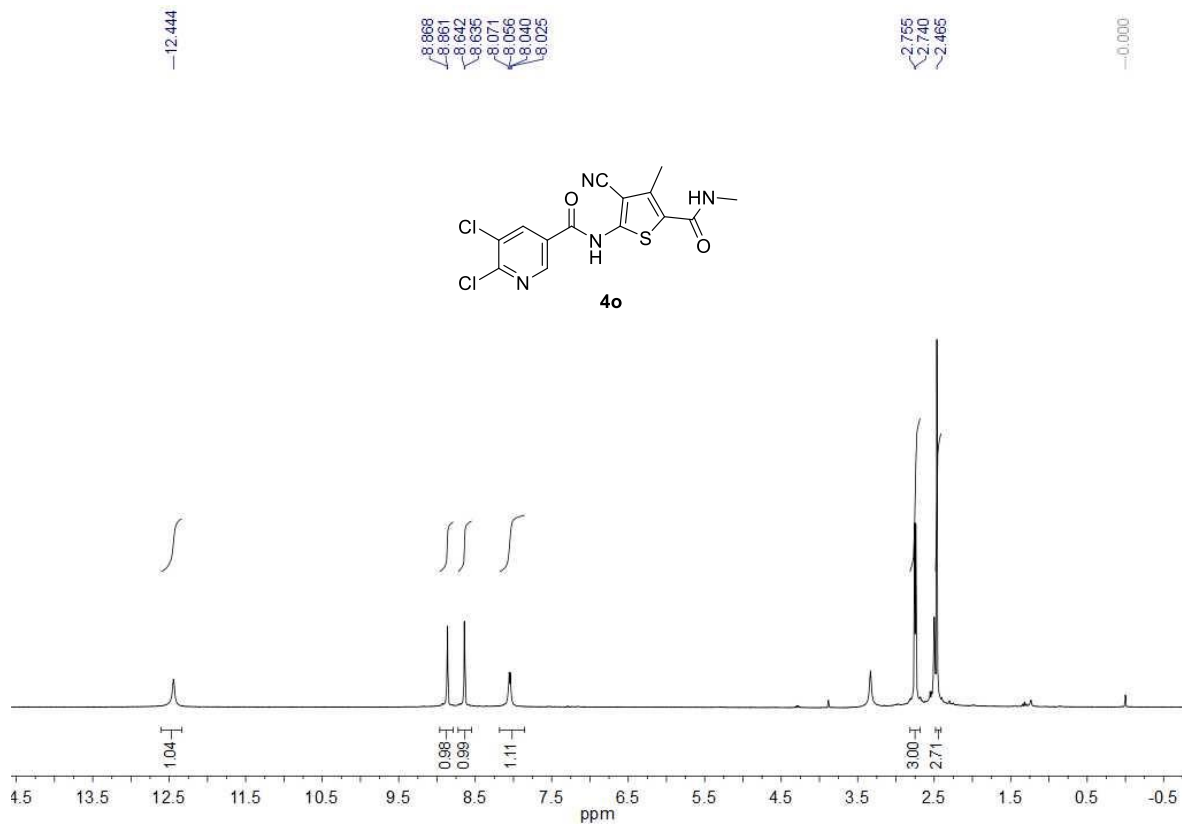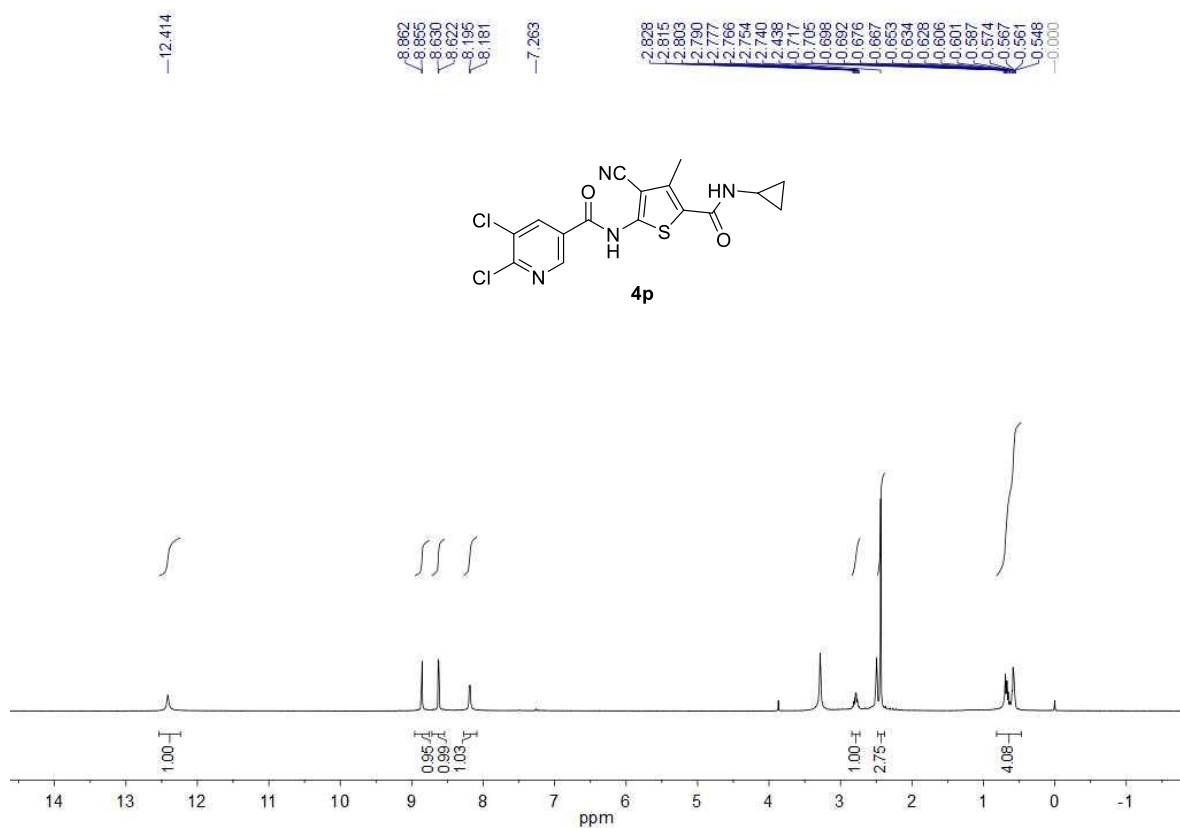

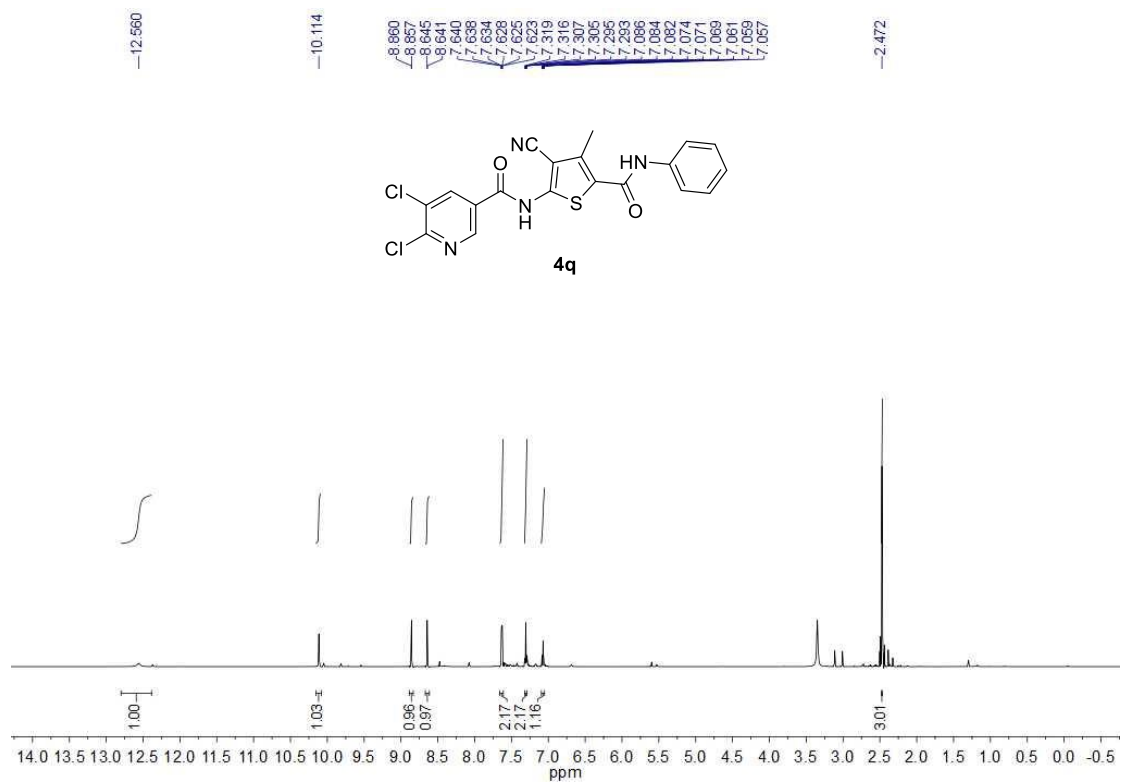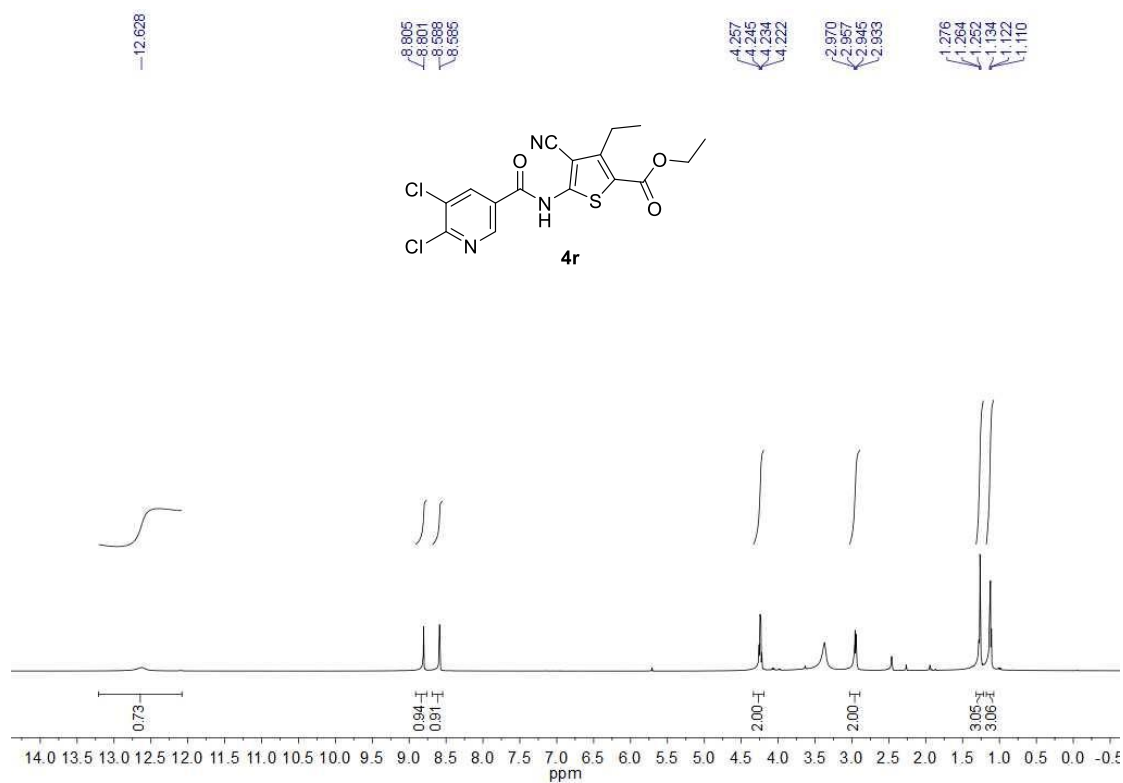

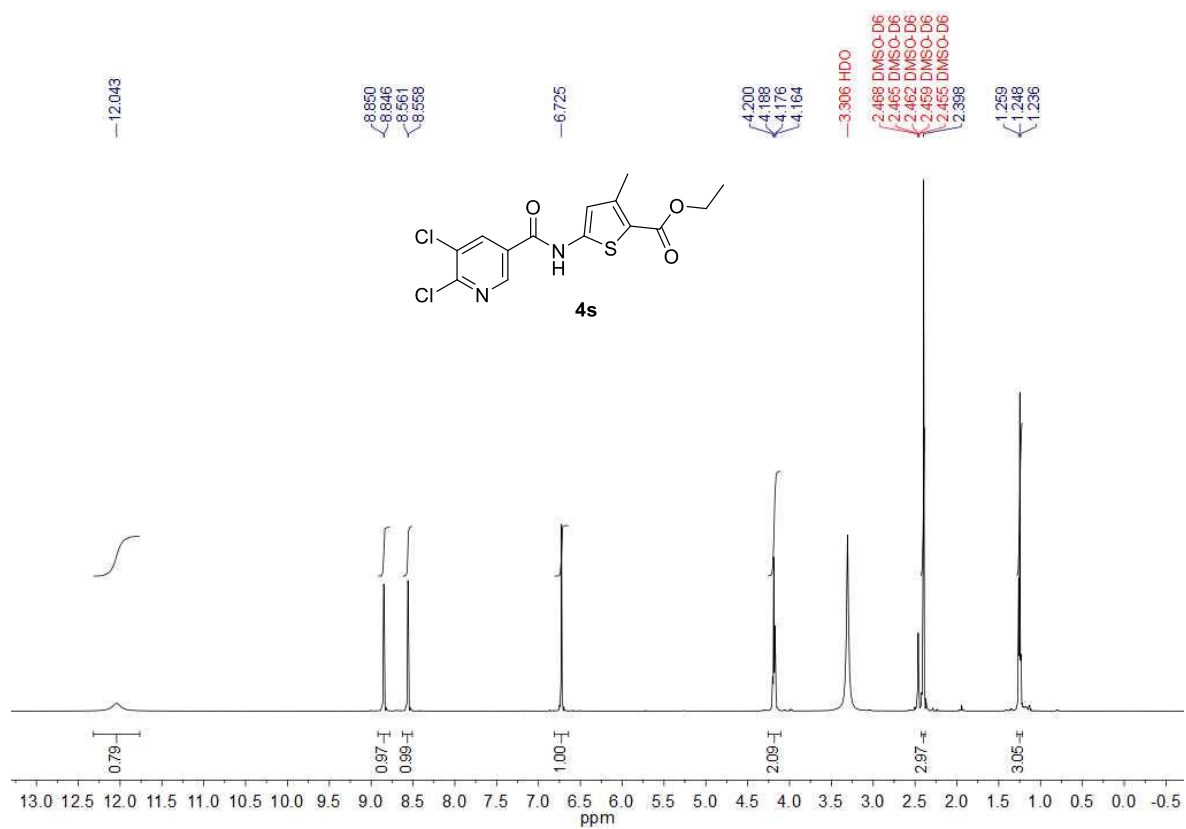

# <sup>13</sup>C NMR SPECTRAL GRAPH

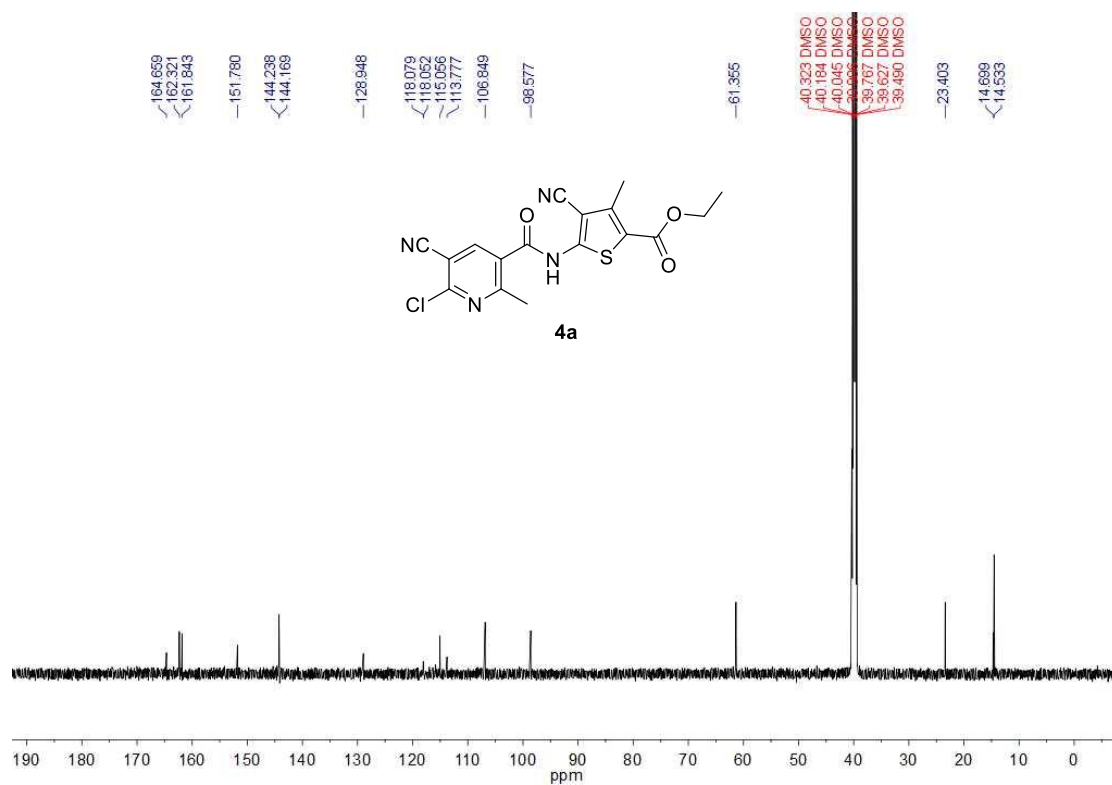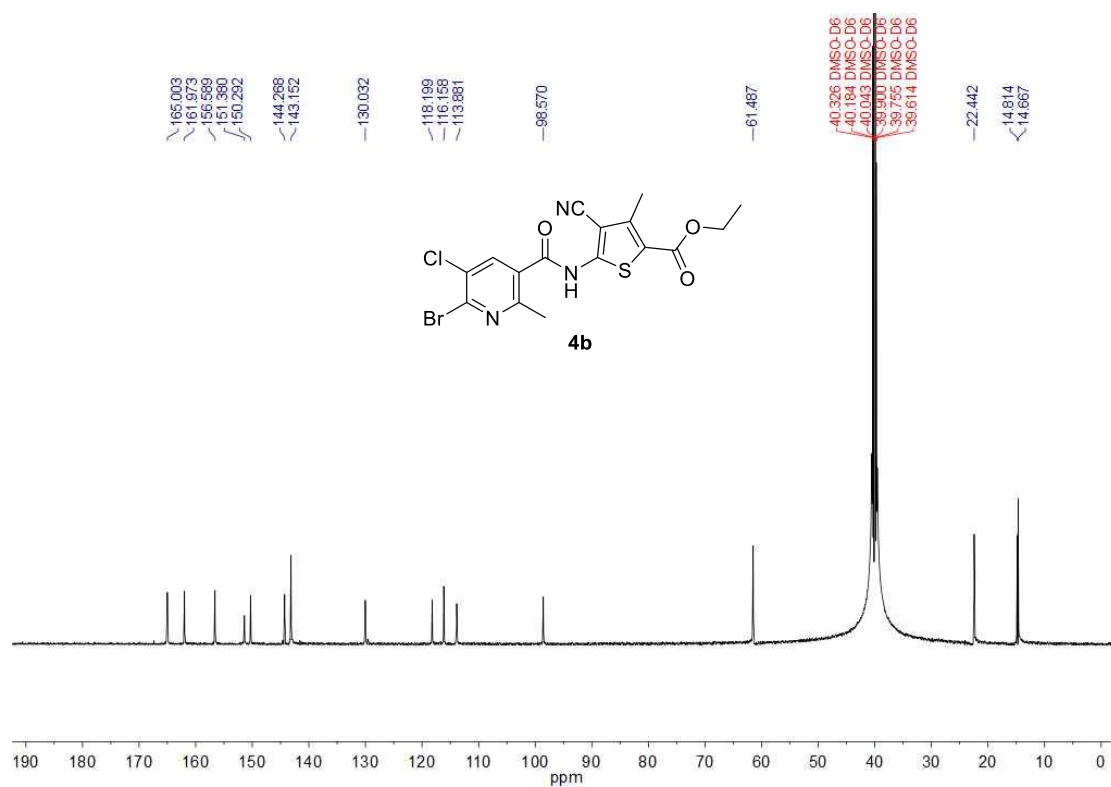

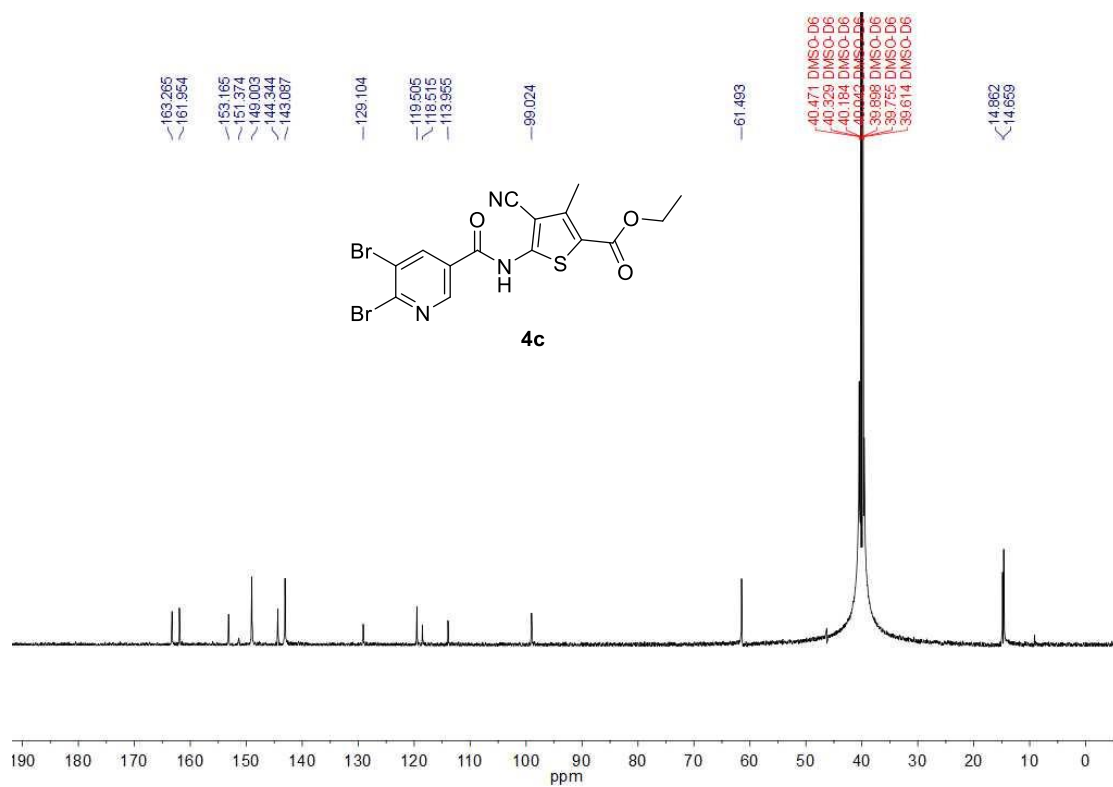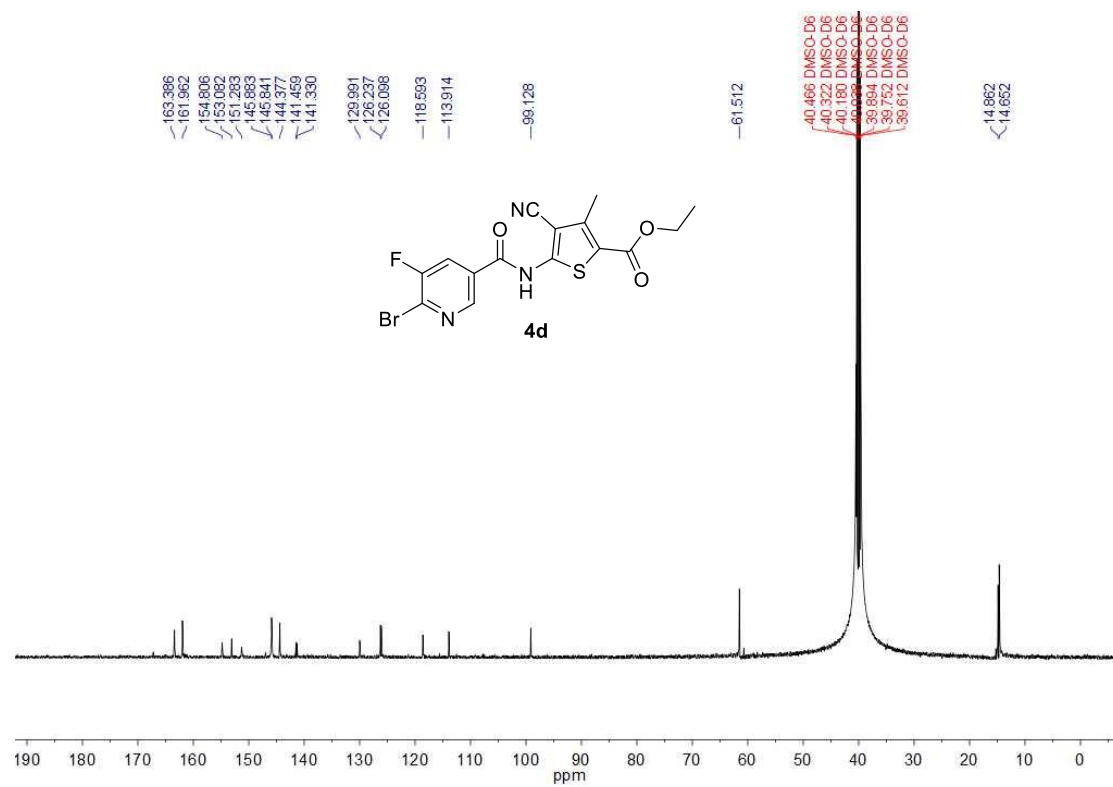

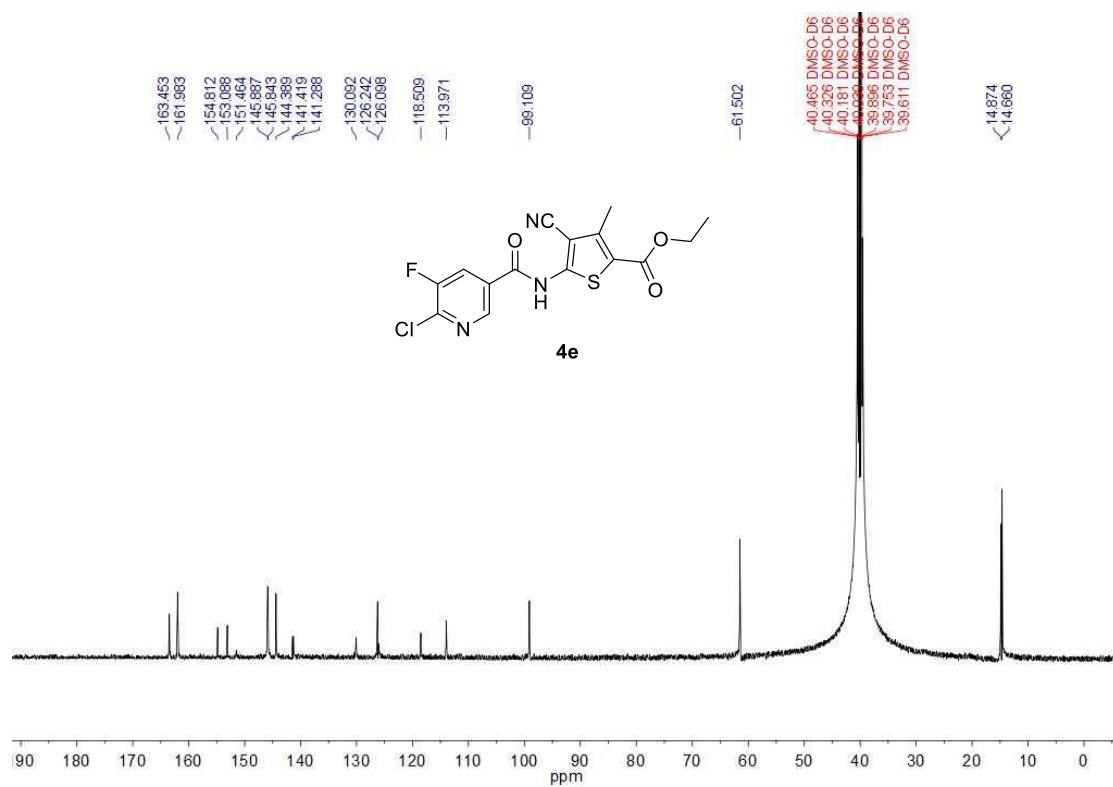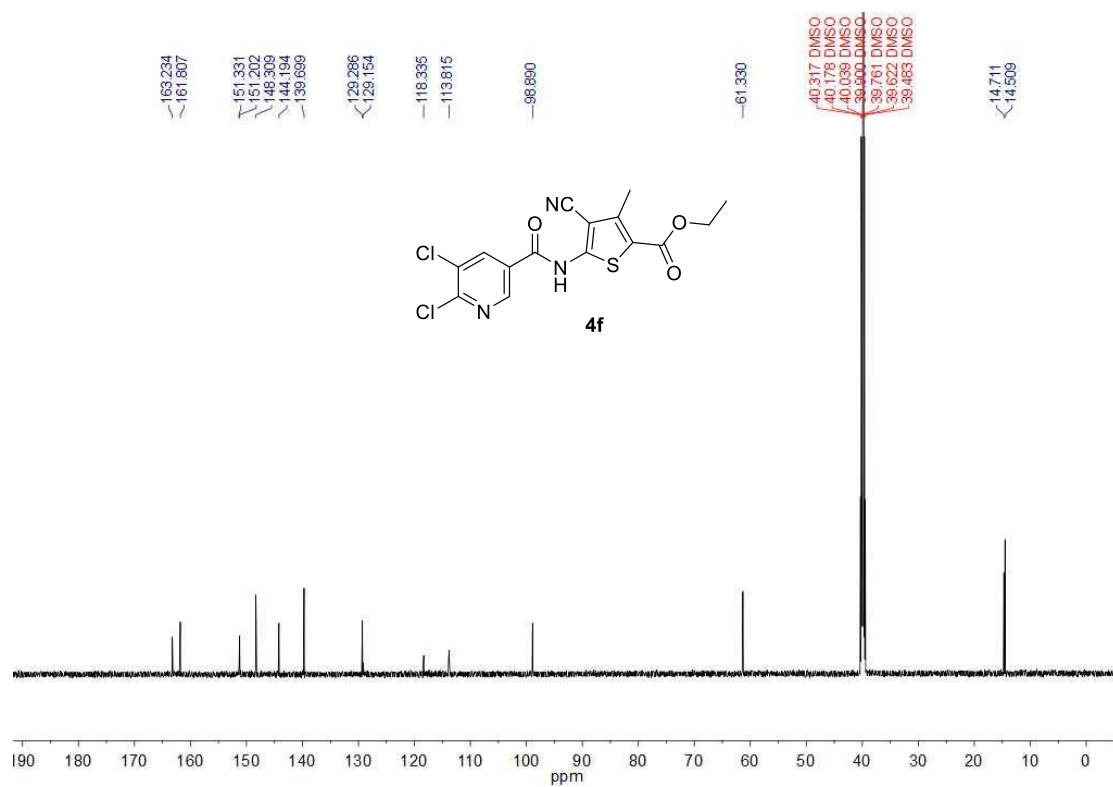

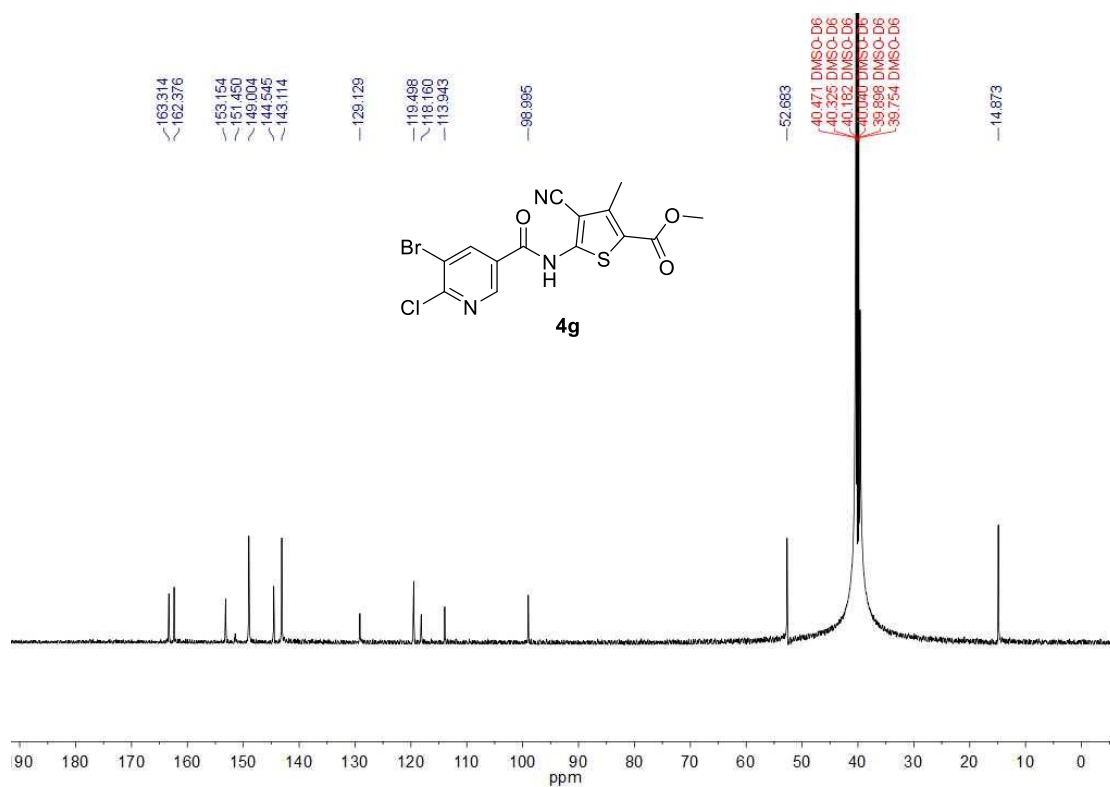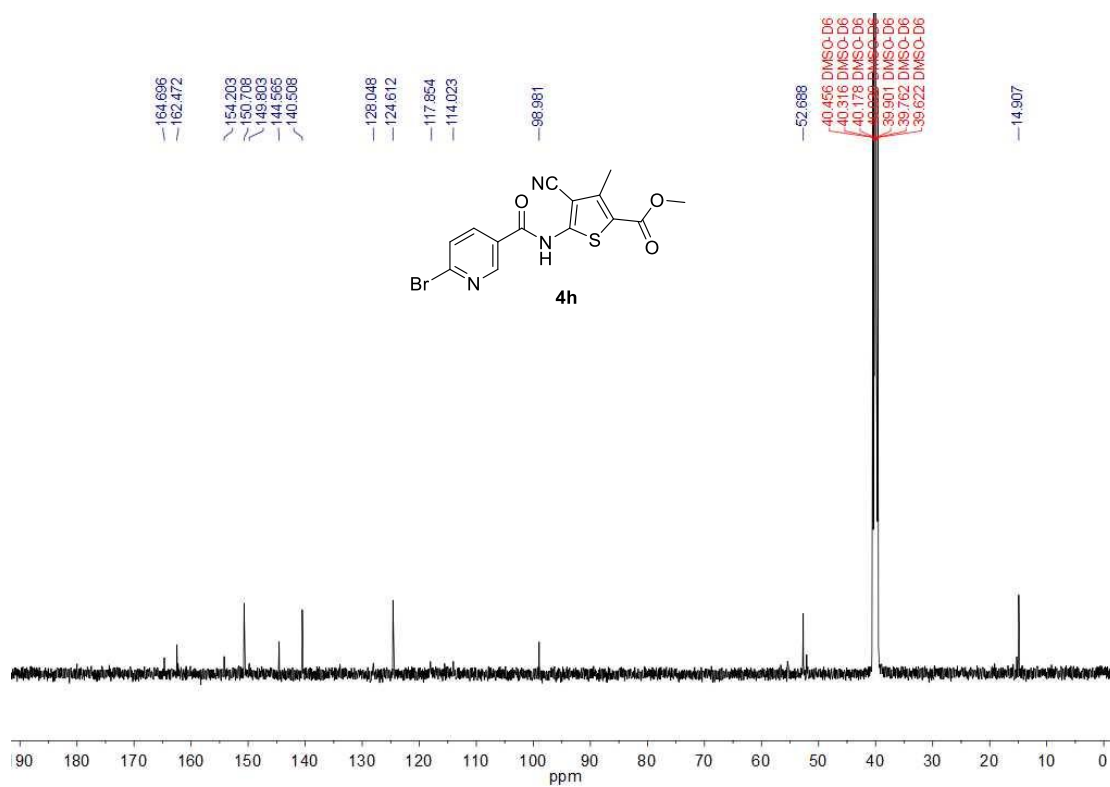

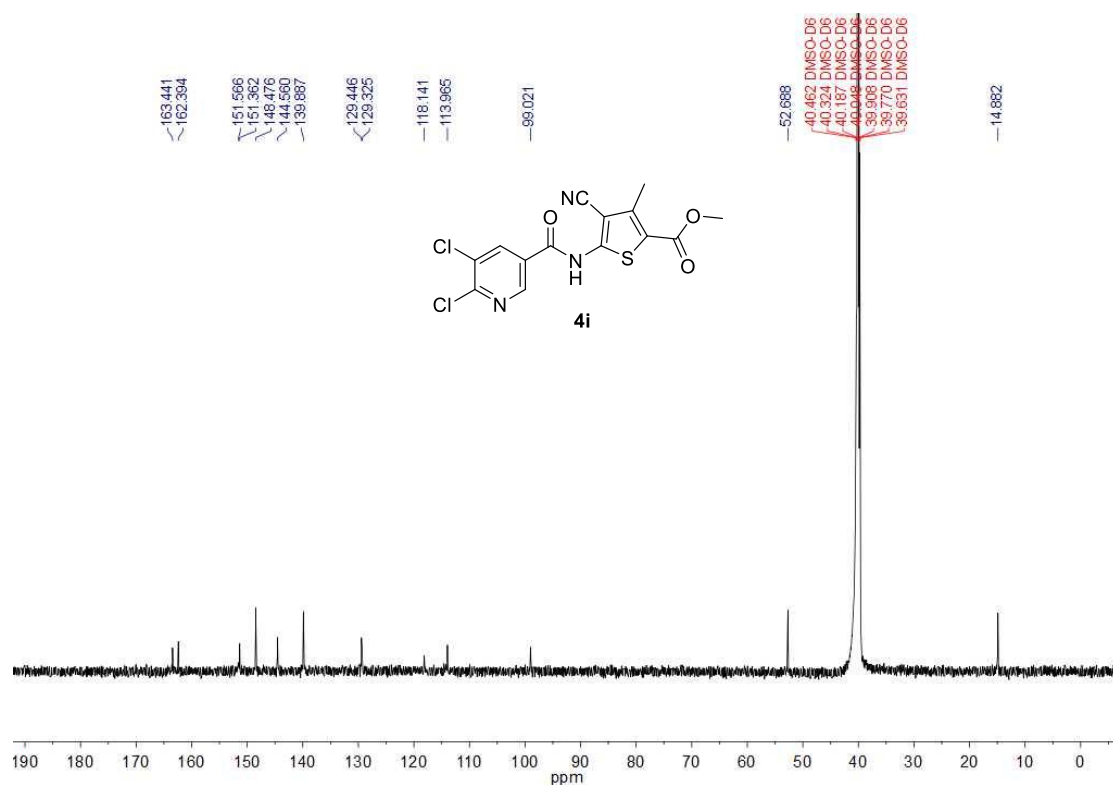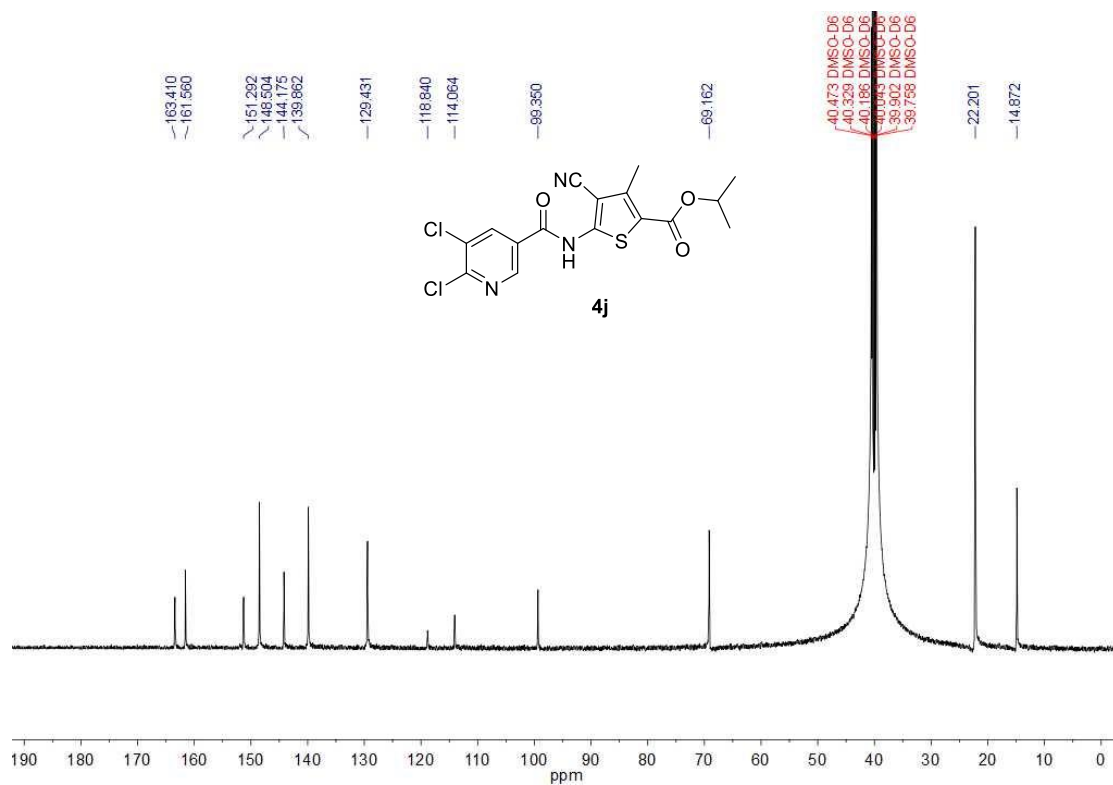



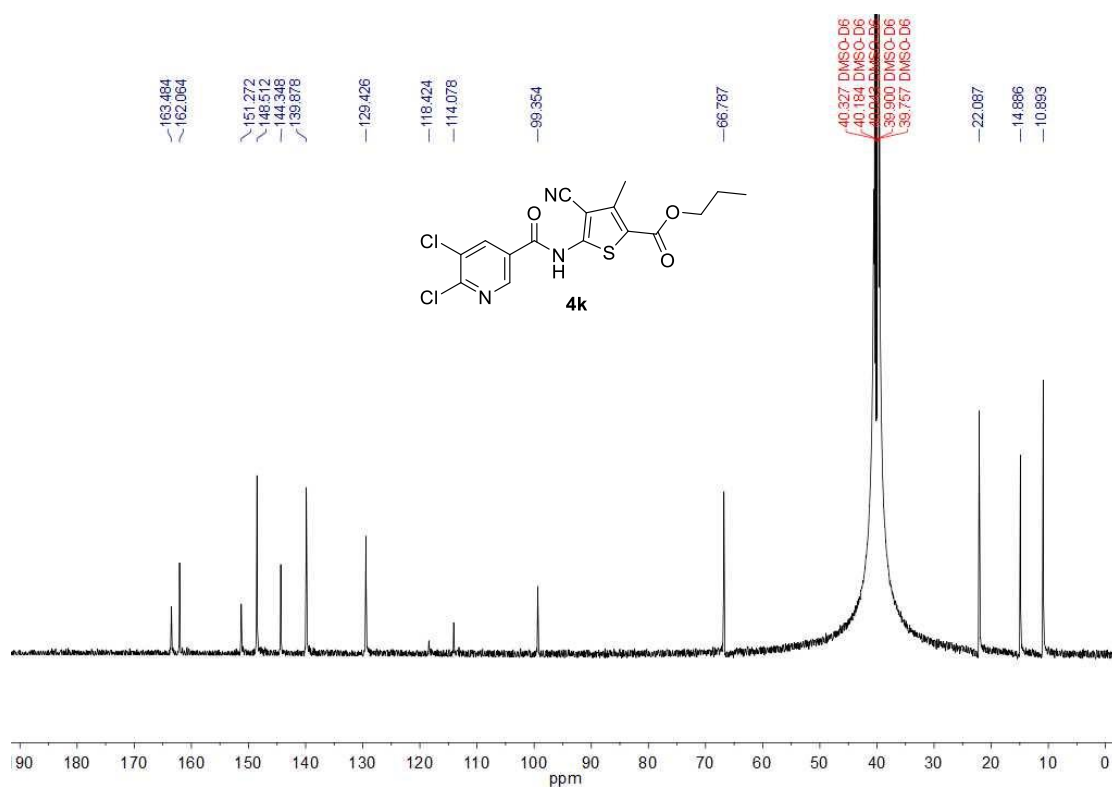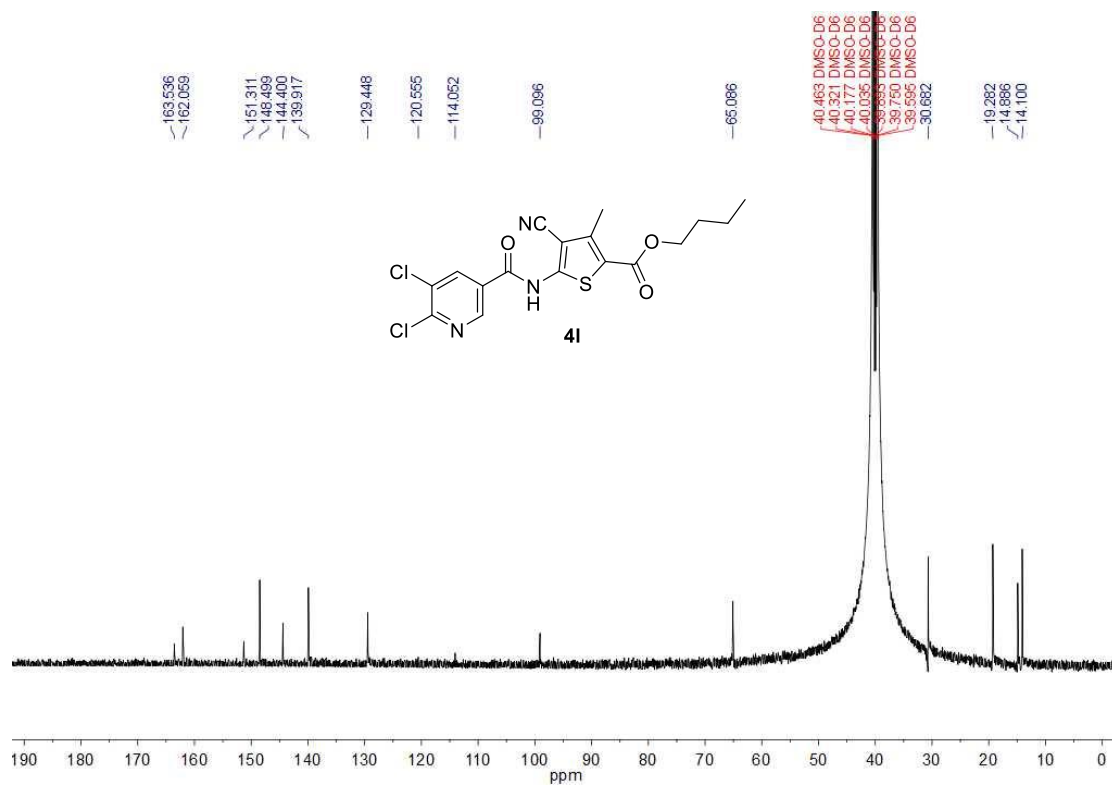

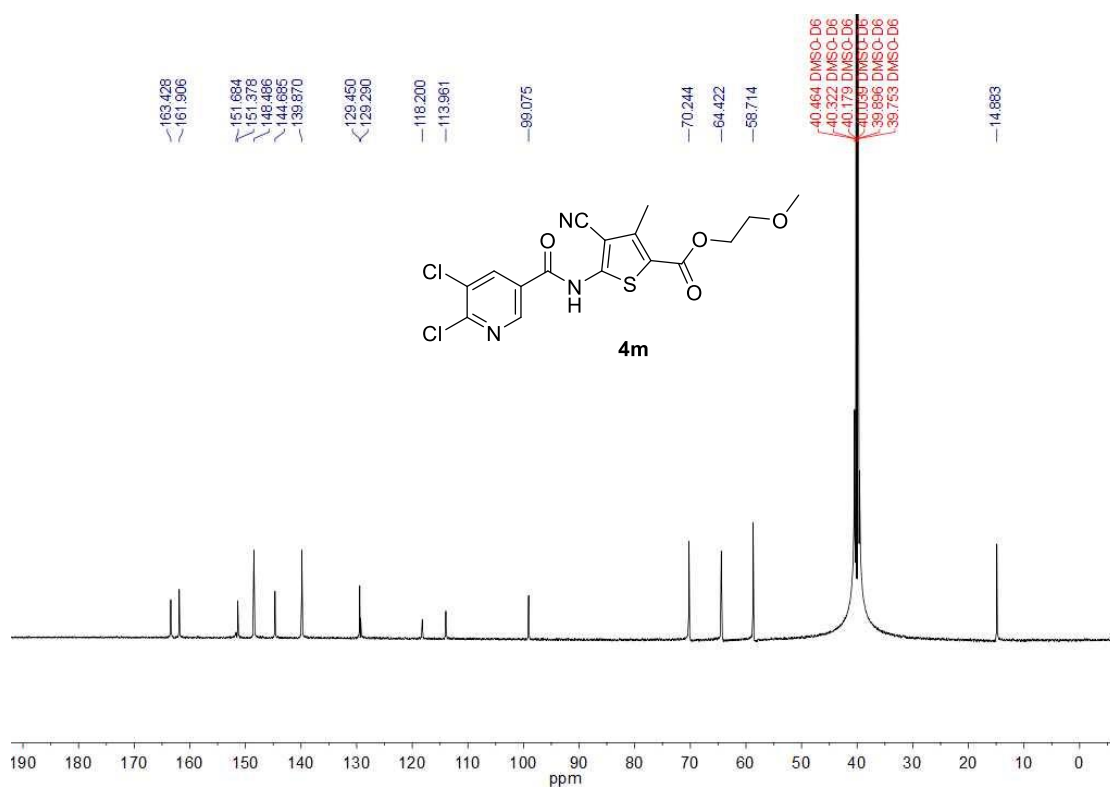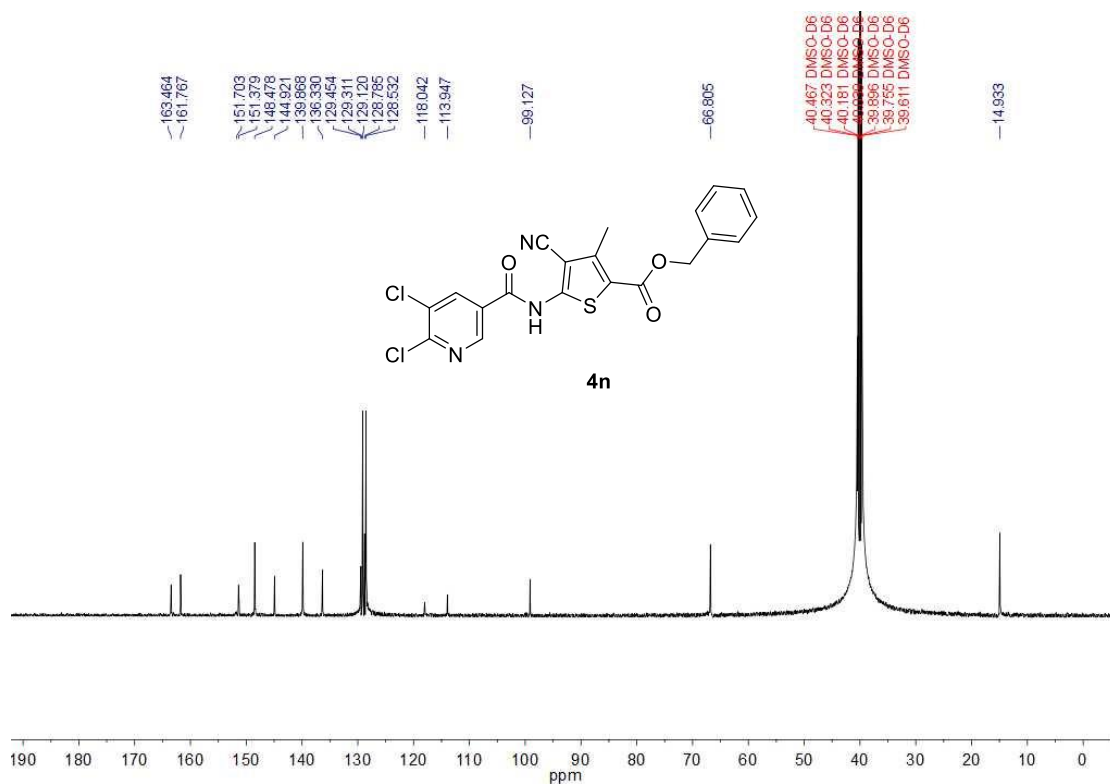

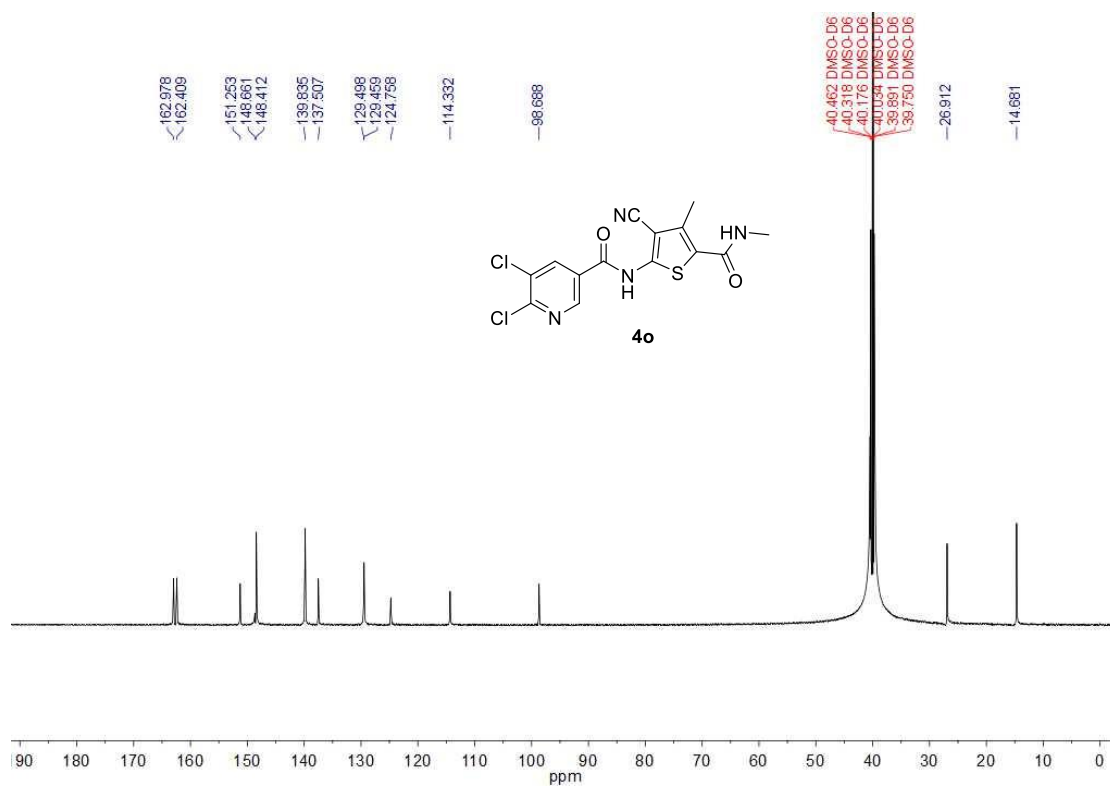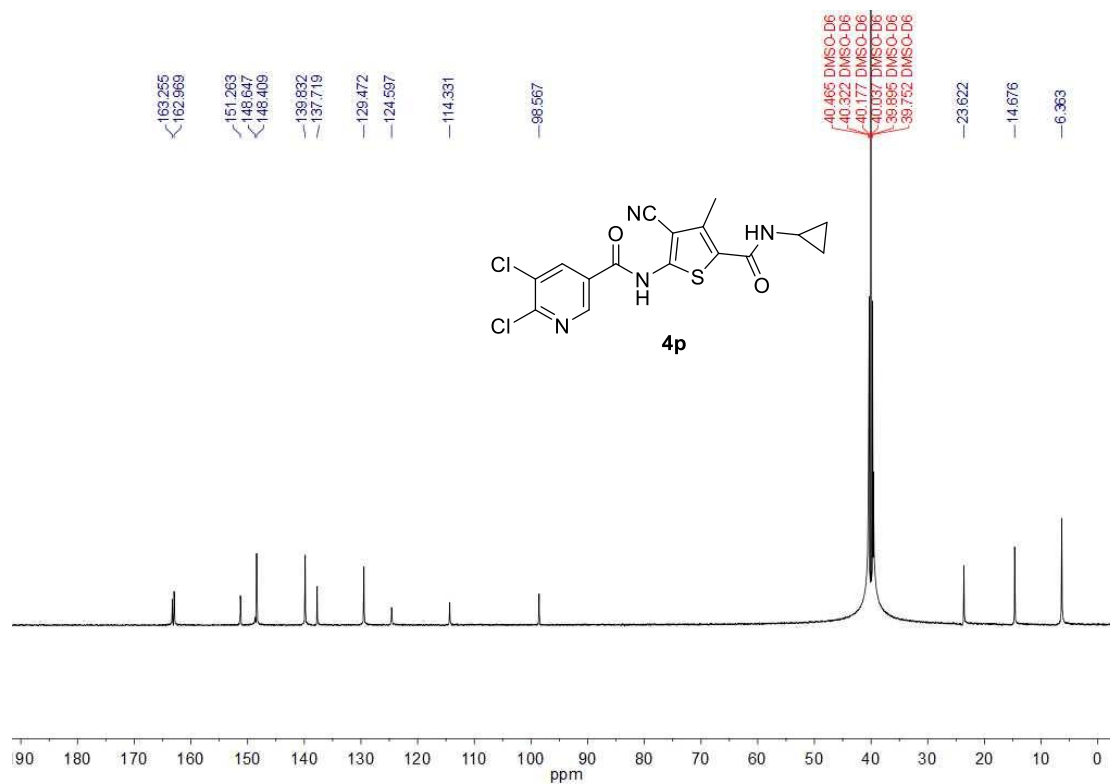

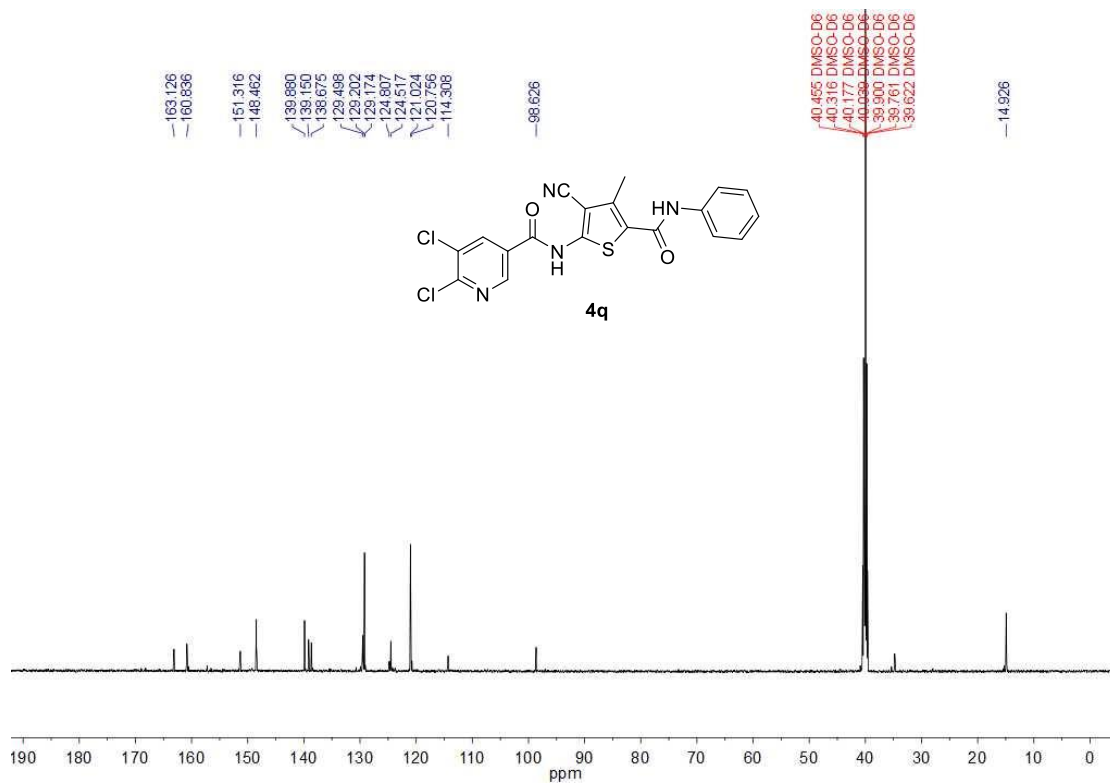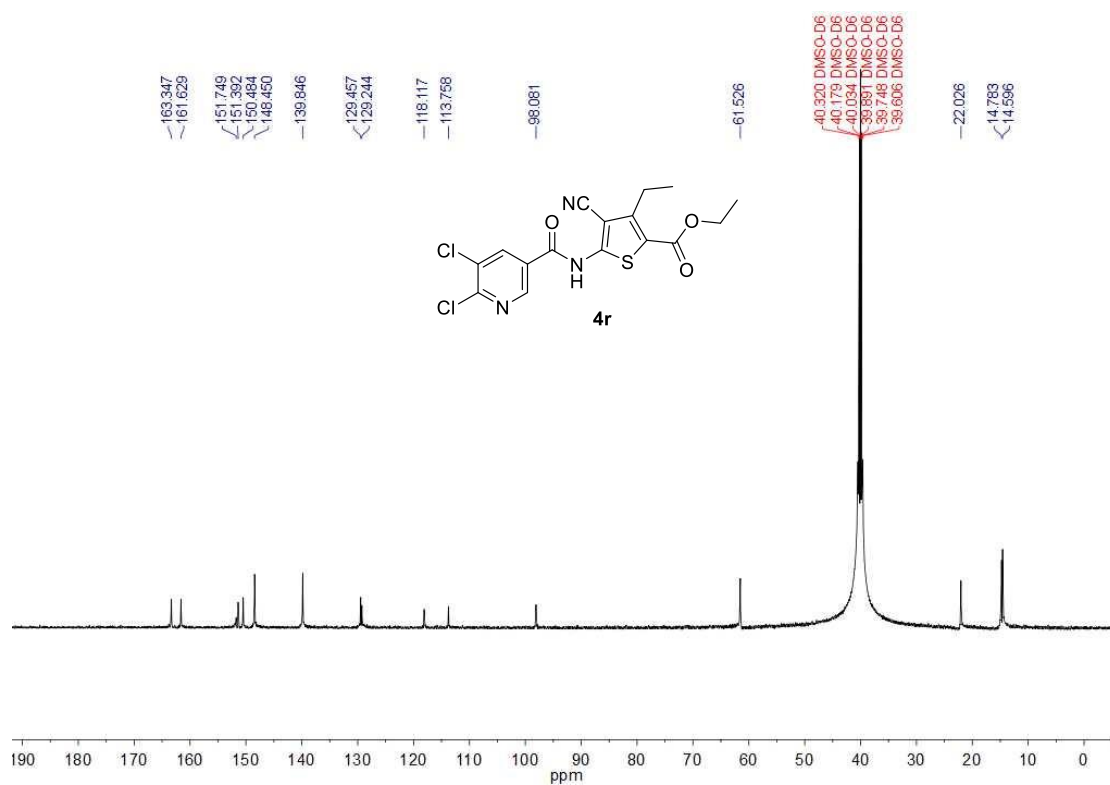

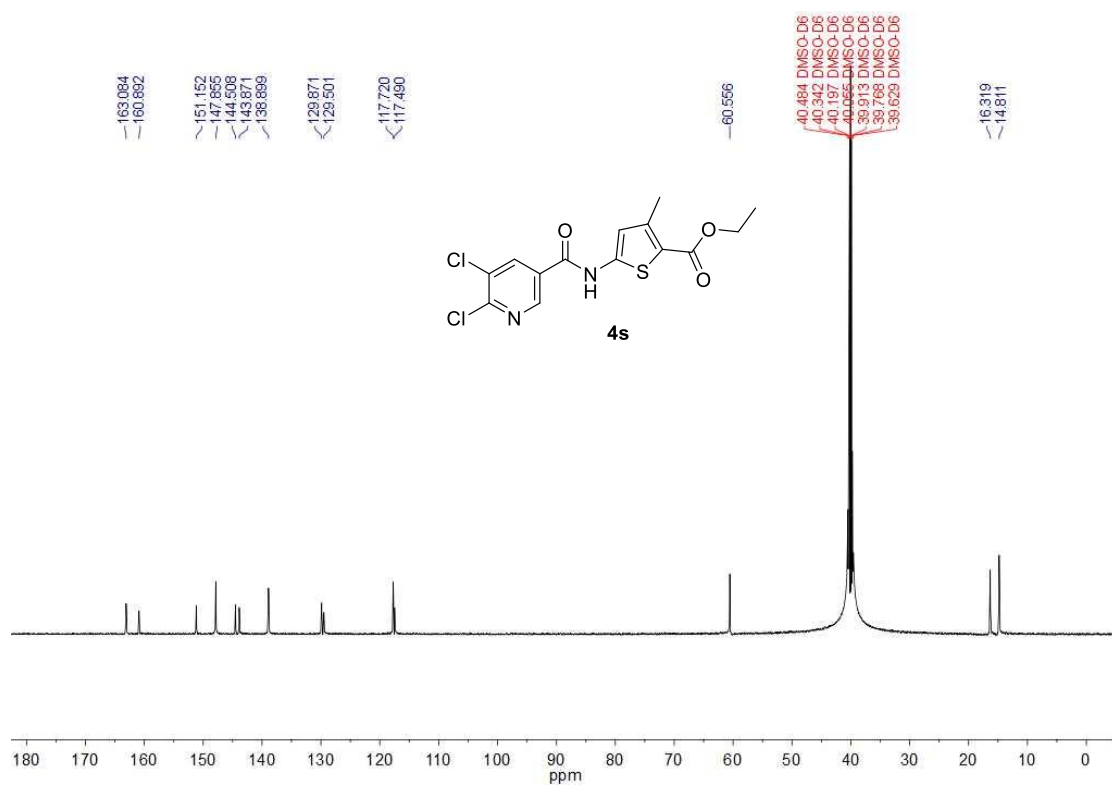

# HR-MS SPECTRAL GRAPH

D:\Data\XY\20211201\WHF-4H

12/01/21 10:51:01

WHF-4H

WHF-4H #144 RT: 1.37 AV: 1 NL: 9.31E8  
T: FTMS - p ESI Full ms [50.0000-750.0000]

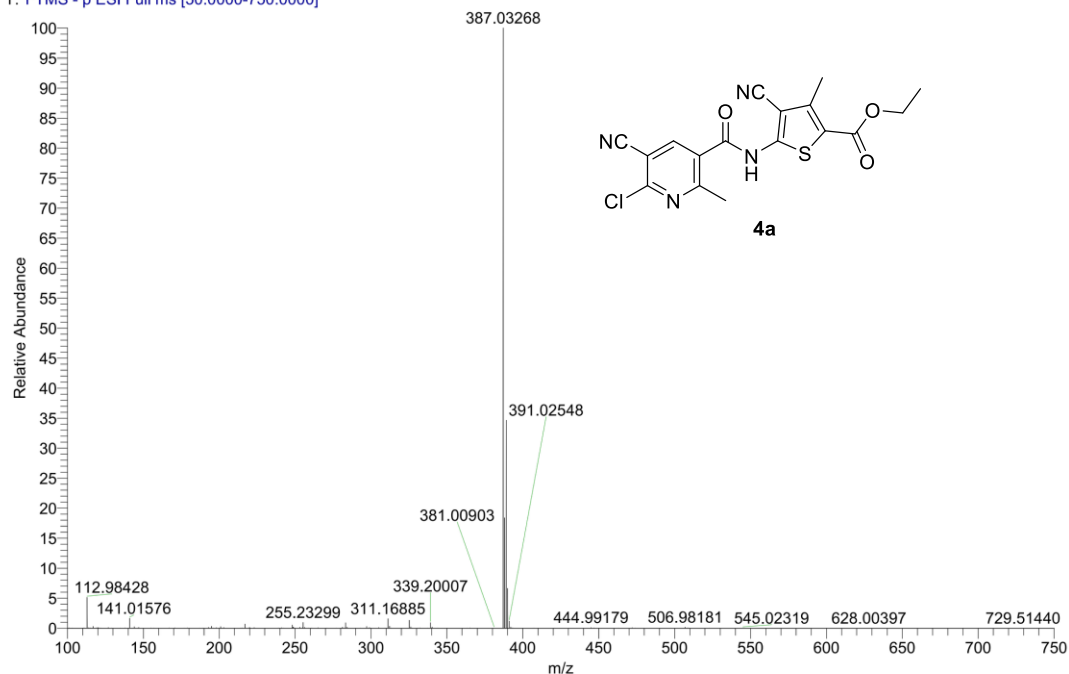

D:\Data\XY\20211105\WHF-4I

11/05/21 12:37:46

WHF-4I

WHF-4I #171 RT: 1.64 AV: 1 SB: 101 0.23-1.03, 1.59-2.72 NL: 6.53E7  
T: FTMS + p ESI Full ms [50.0000-750.0000]

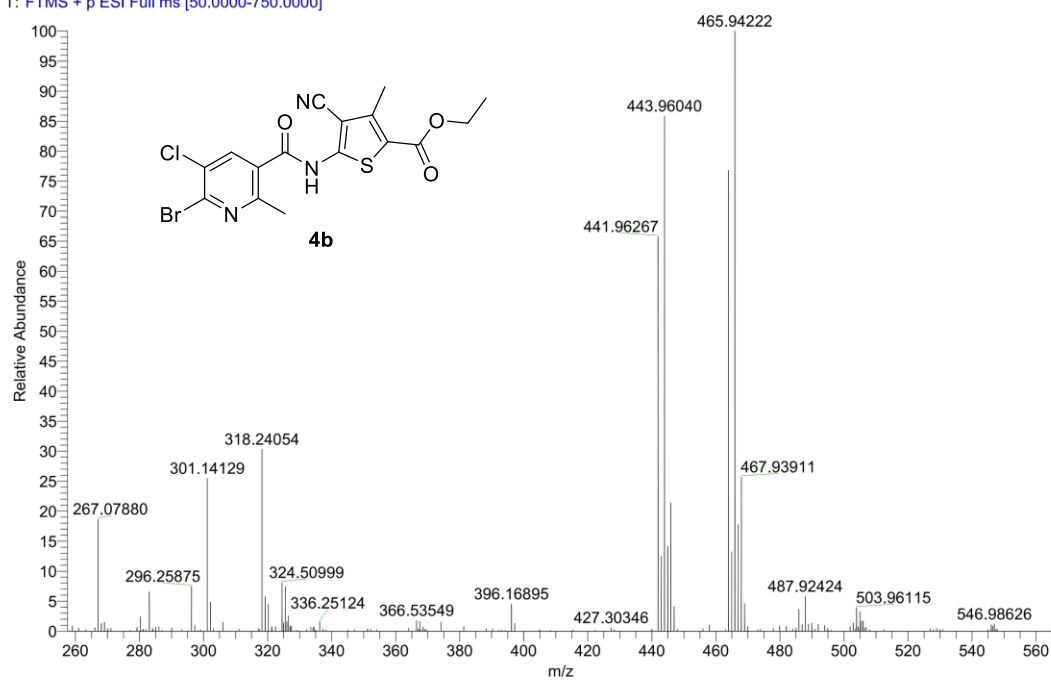

WHF0671 #1230 RT: 11.98 AV: 1 NL: 2.21E8  
T: FTMS - p ESI Full ms [100.0000-1200.0000]

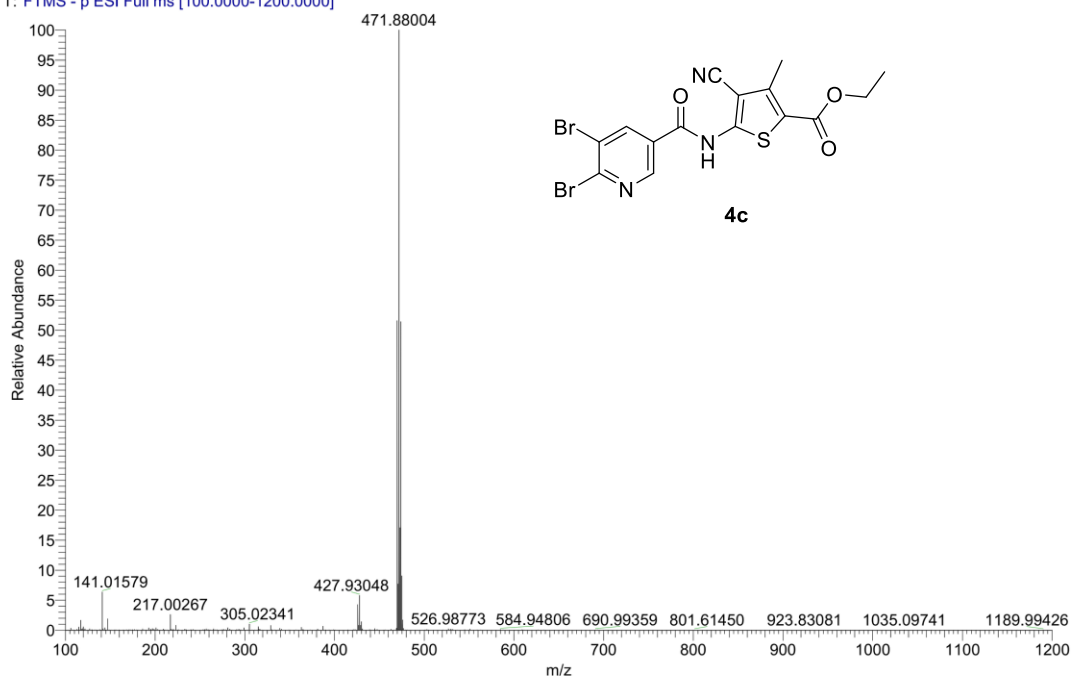

WHF0672 #1050 RT: 10.24 AV: 1 NL: 1.24E8  
T: FTMS - p ESI Full ms [100.0000-1200.0000]

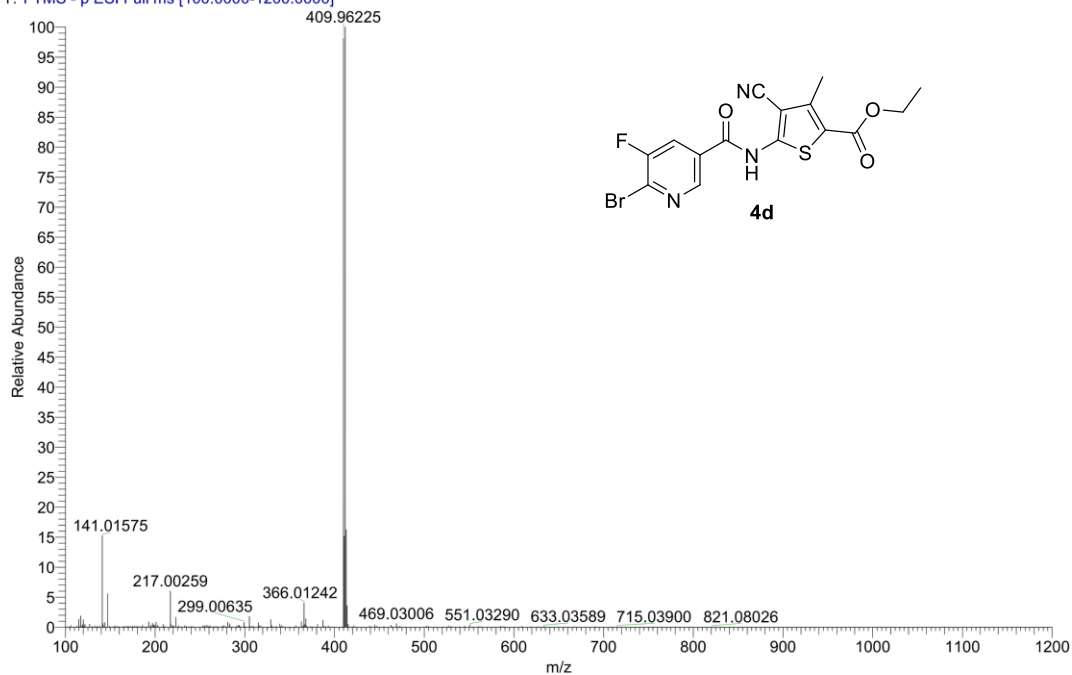

WHF-4E #158 RT: 1.51 AV: 1 NL: 8.46E8  
T: FTMS - p ESI Full ms [50.0000-750.0000]

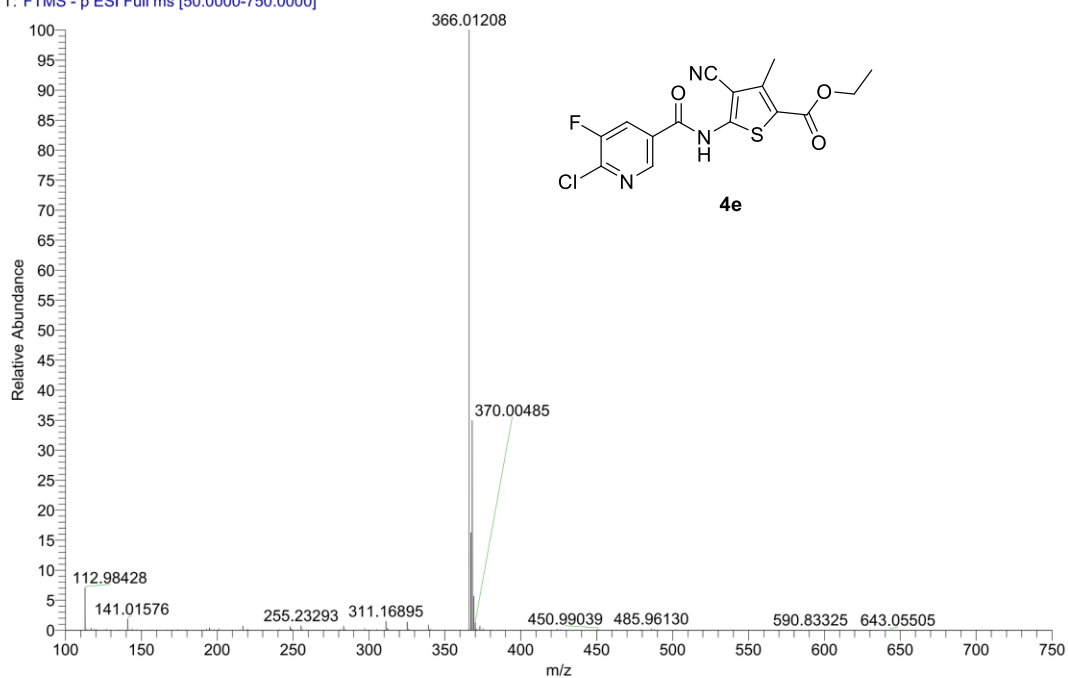

WHF-4C-1 #173 RT: 1.66 AV: 1 SB: 102 0.23-1.03, 1.59-2.72 NL: 5.49E7  
T: FTMS + p ESI Full ms [50.0000-750.0000]

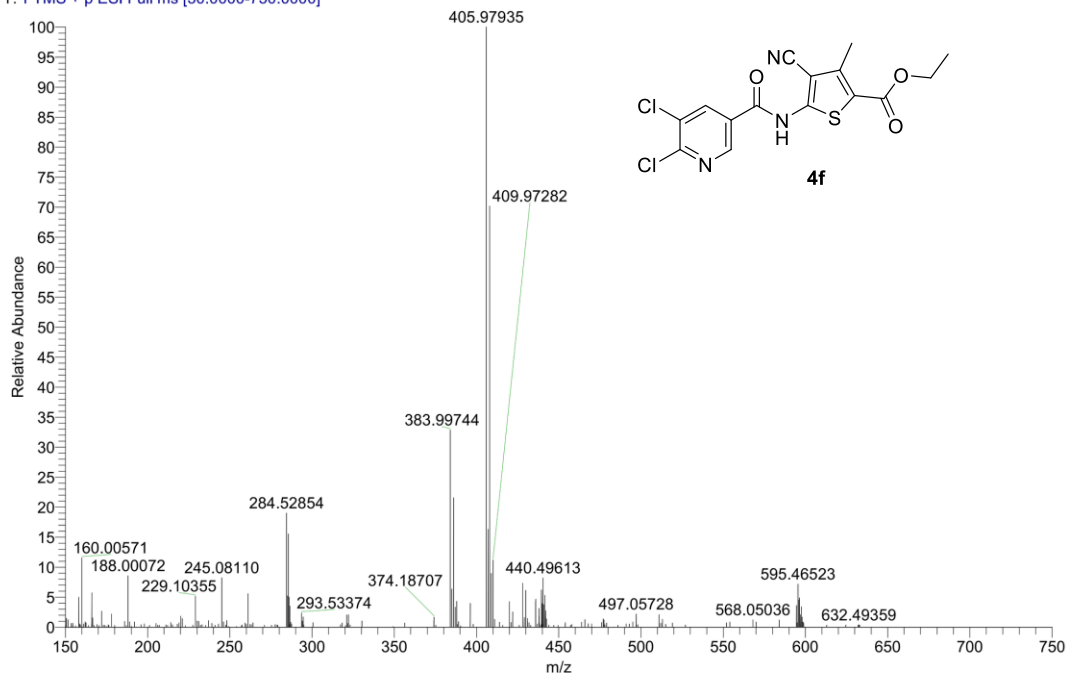



WHF0669 #1003 RT: 9.76 AV: 1 SB: 99 0.23-1.03 , 1.59-2.72 NL: 4.91E7  
T: FTMS + p ESI Full ms [100.0000-1200.0000]

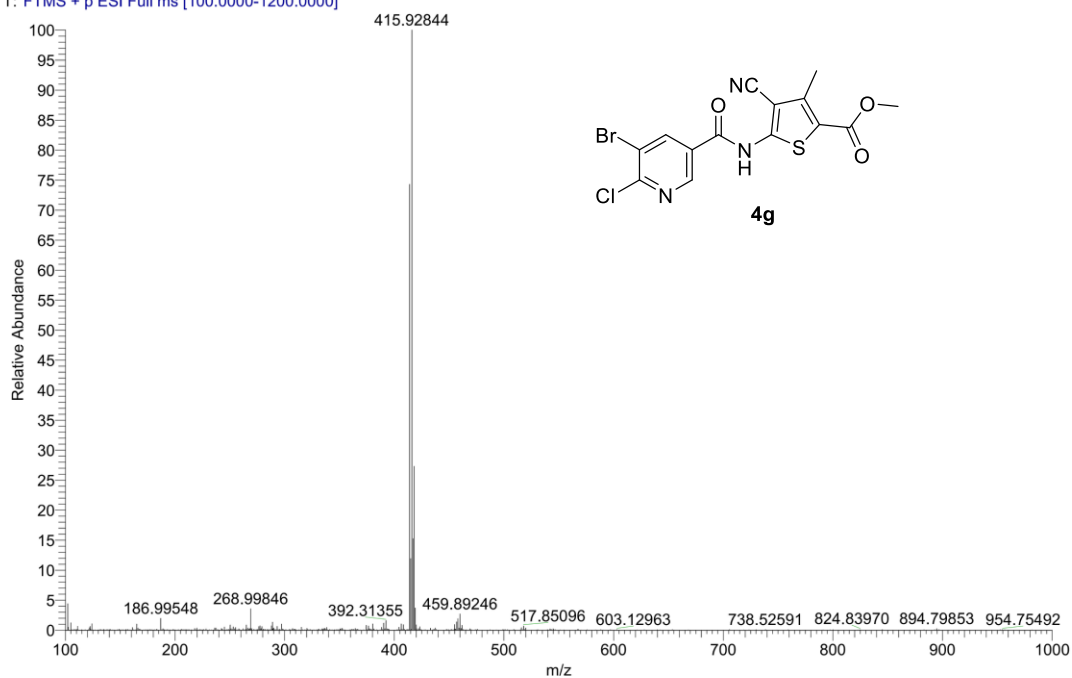

WHF0670 #677 RT: 6.59 AV: 1 SB: 100 0.23-1.04 , 1.59-2.72 NL: 1.77E7  
T: FTMS + p ESI Full ms [100.0000-1200.0000]

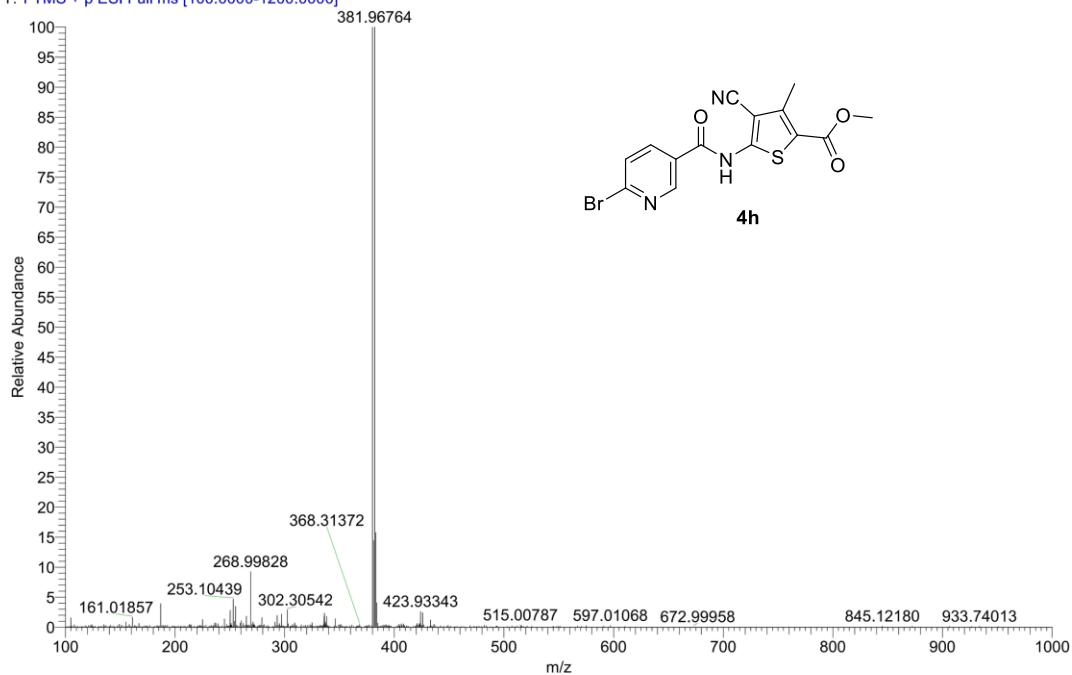

WHF-6A #164 RT: 1.57 AV: 1 NL: 4.12E8  
T: FTMS - p ESI Full ms [50.0000-750.0000]

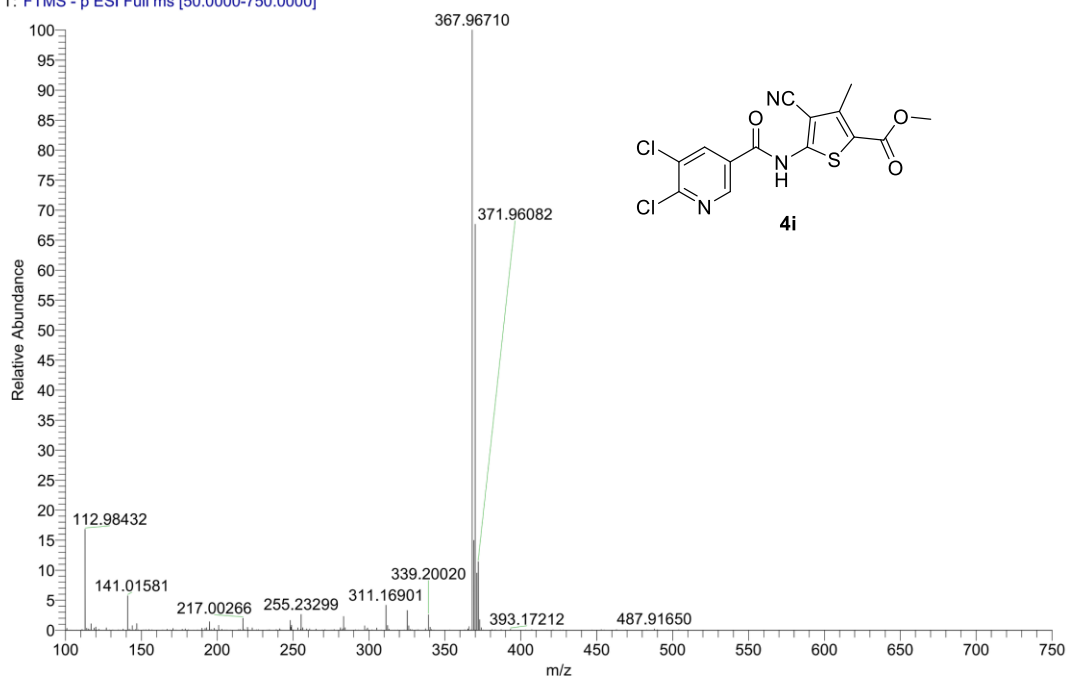

WHF-6B #188 RT: 1.80 AV: 1 NL: 4.19E8  
T: FTMS - p ESI Full ms [50.0000-750.0000]

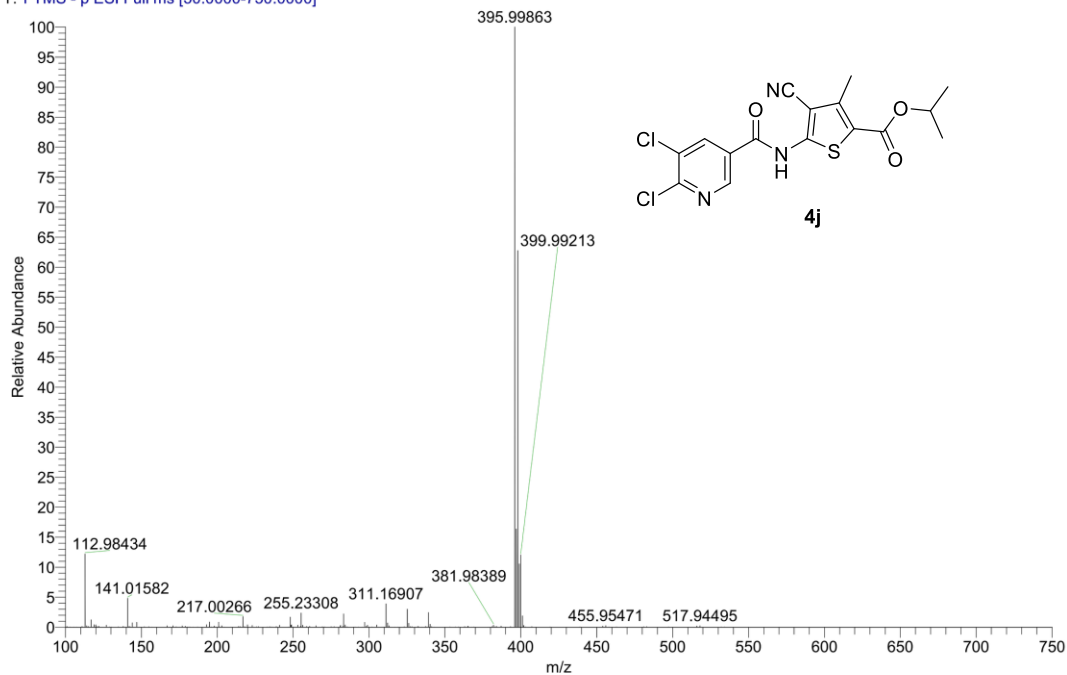

WHF-6C #196 RT: 1.87 AV: 1 NL: 4.37E8  
T: FTMS - p ESI Full ms [50.0000-750.0000]

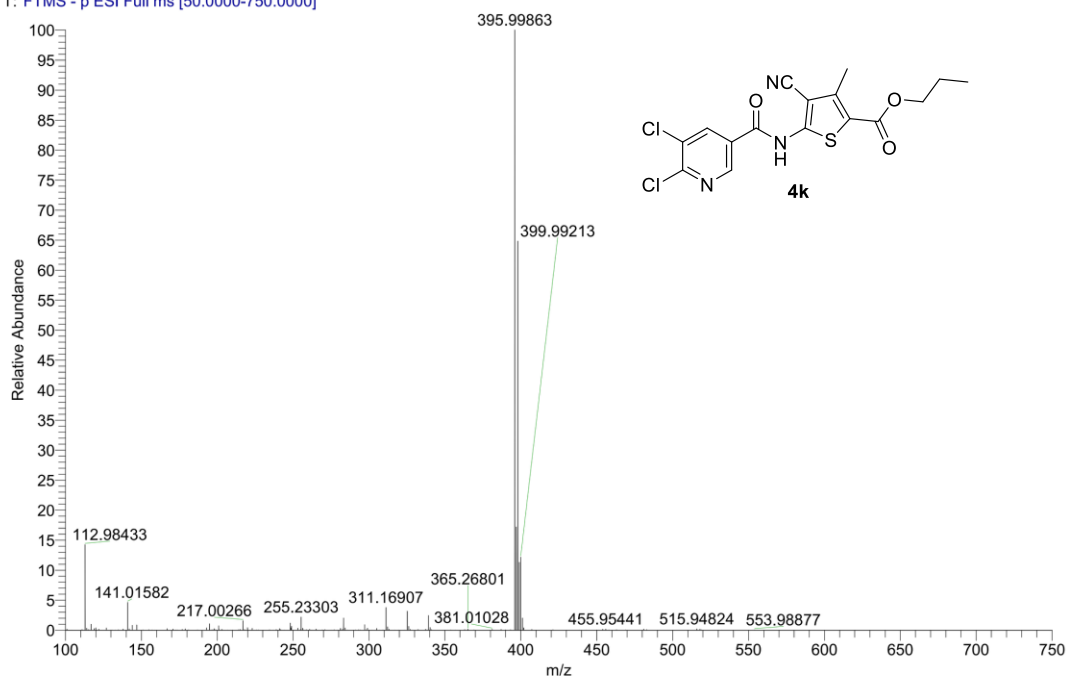

WHF-6D #224 RT: 2.14 AV: 1 NL: 3.11E8  
T: FTMS - p ESI Full ms [50.0000-750.0000]

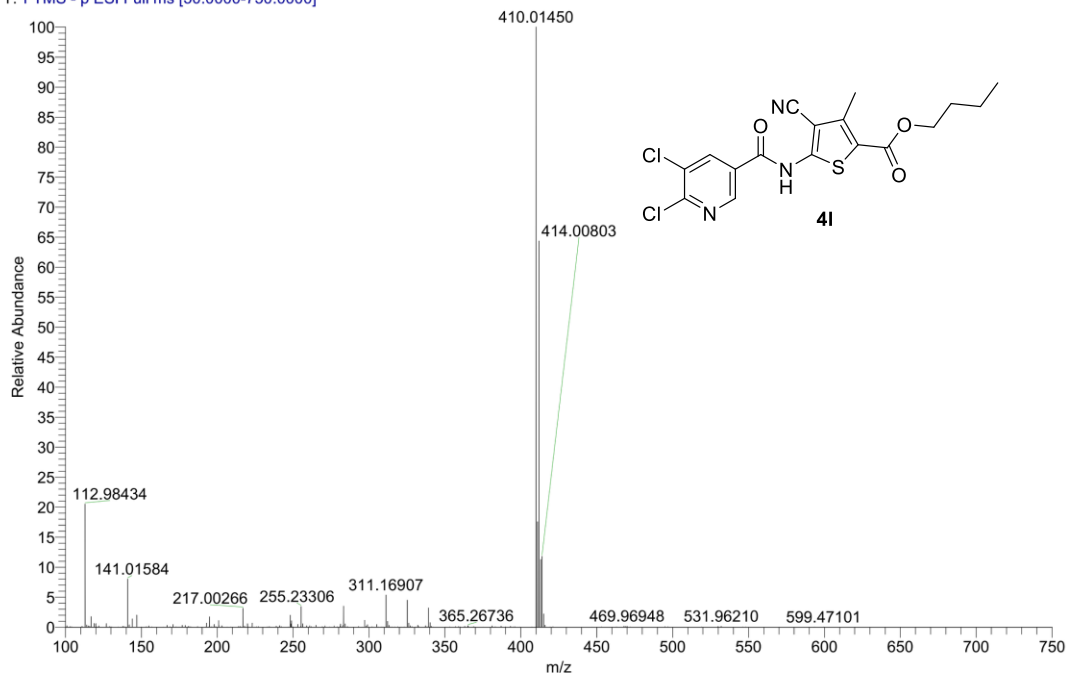

WHF-6E #160 RT: 1.53 AV: 1 NL: 3.38E8  
T: FTMS - p ESI Full ms [50.0000-750.0000]

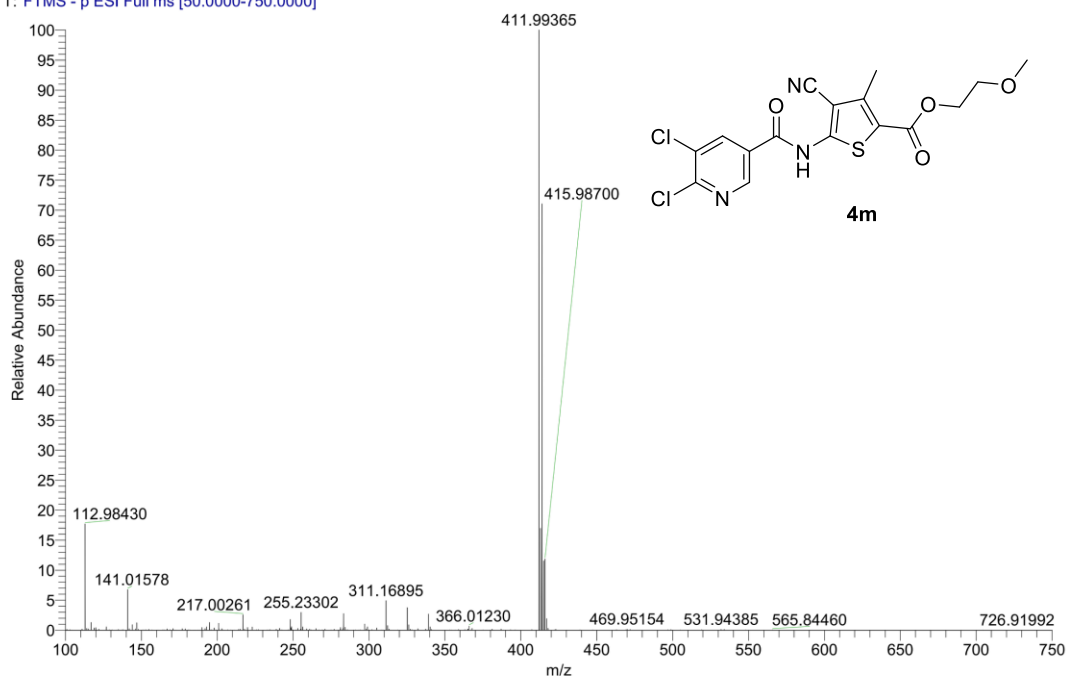

WHF-6F #212 RT: 2.03 AV: 1 NL: 3.82E8  
T: FTMS - p ESI Full ms [50.0000-750.0000]

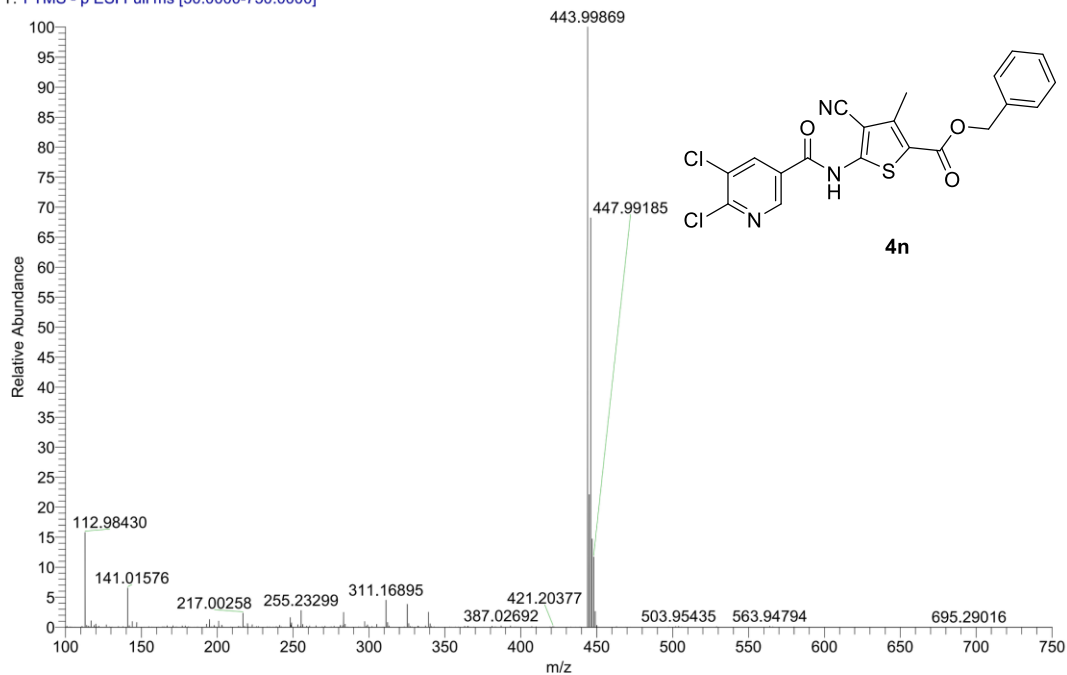

WHF-6G #132 RT: 1.26 AV: 1 NL: 8.73E8  
T: FTMS - p ESI Full ms [50.0000-750.0000]

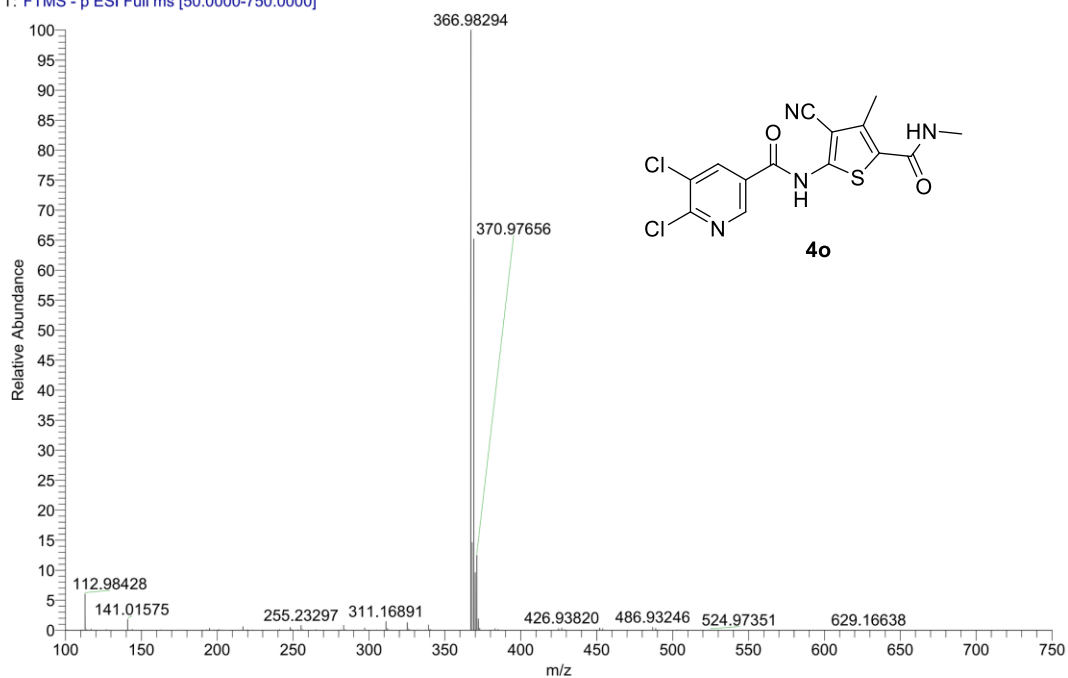

WHF-6H #137 RT: 1.31 AV: 1 SB: 102 0.23-1.03, 1.59-2.72 NL: 8.09E7  
T: FTMS + p ESI Full ms [50.0000-750.0000]

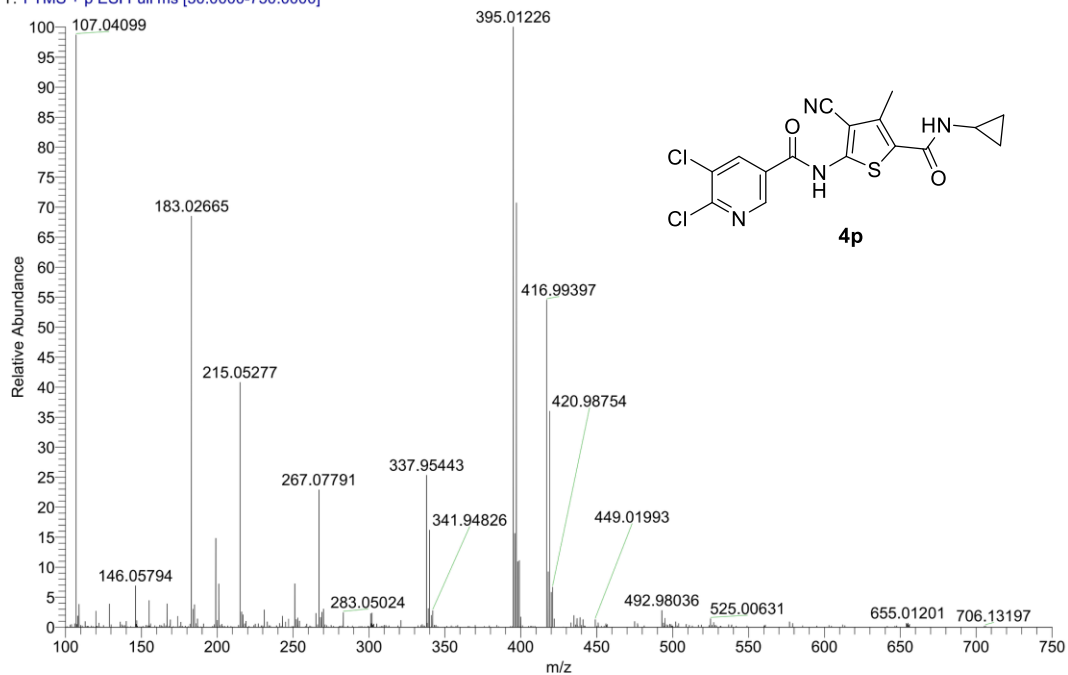

WHF-6I #149 RT: 1.42 AV: 1 SB: 102 0.23-1.03 , 1.59-2.72 NL: 4.44E7  
T: FTMS + p ESI Full ms [50.0000-750.0000]

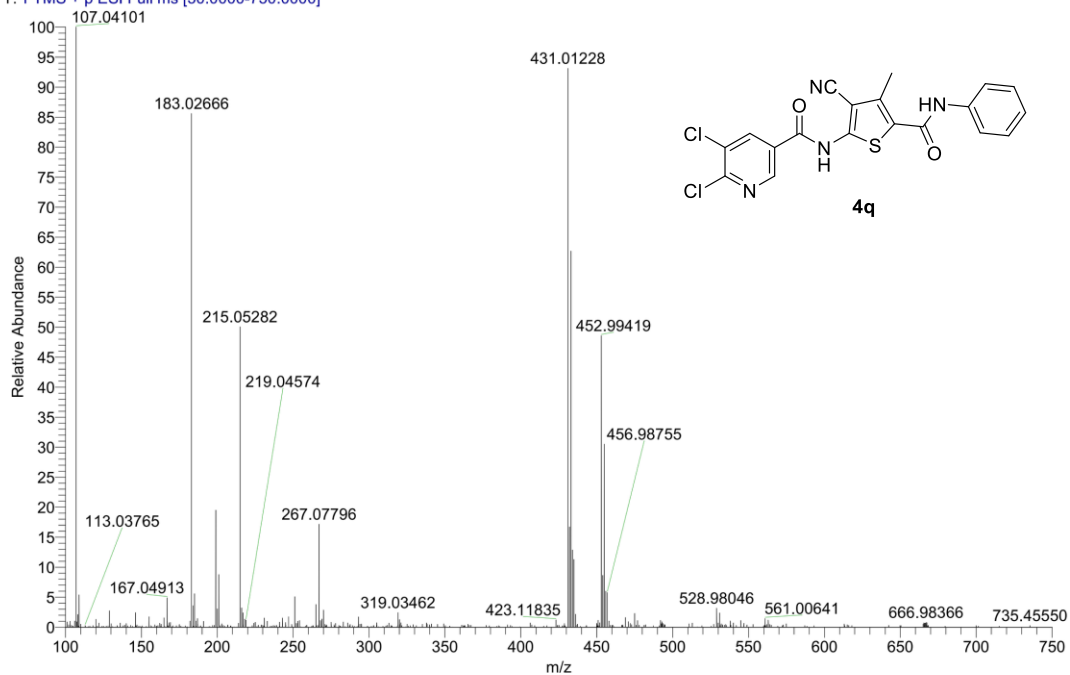

WHF-6J #187 RT: 1.79 AV: 1 SB: 102 0.23-1.03 , 1.59-2.72 NL: 4.26E6  
T: FTMS + p ESI Full ms [50.0000-750.0000]

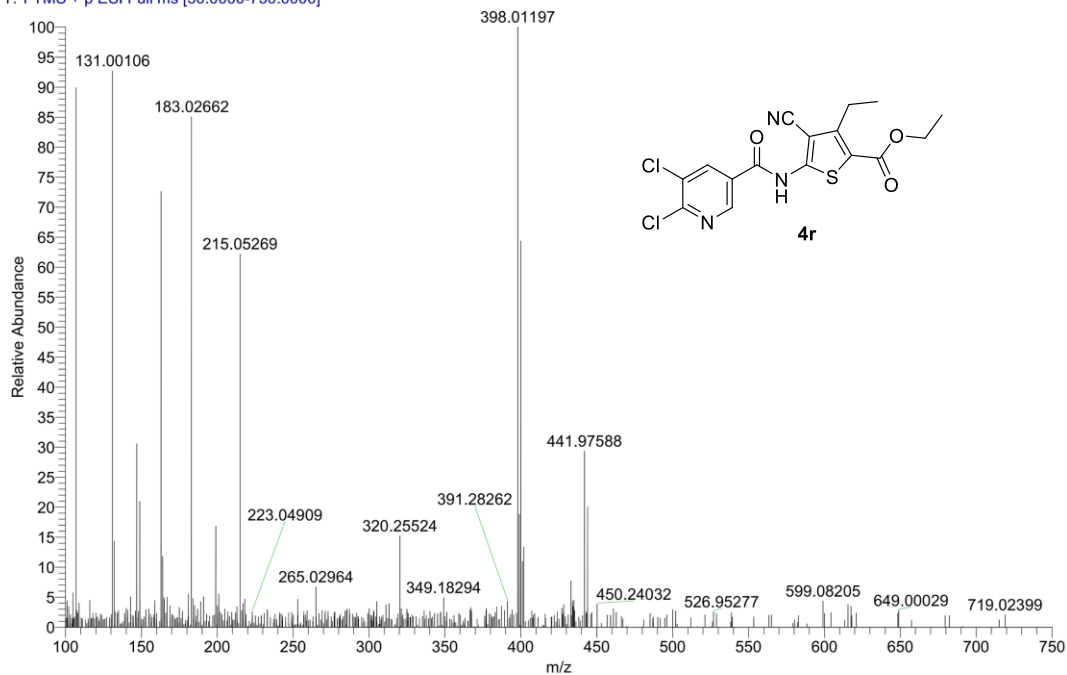

WHF-6K #155 RT: 1.48 AV: 1 SB: 102 0.23-1.03 , 1.59-2.72 NL: 7.78E7  
T: FTMS + p ESI Full ms [50.0000-750.0000]

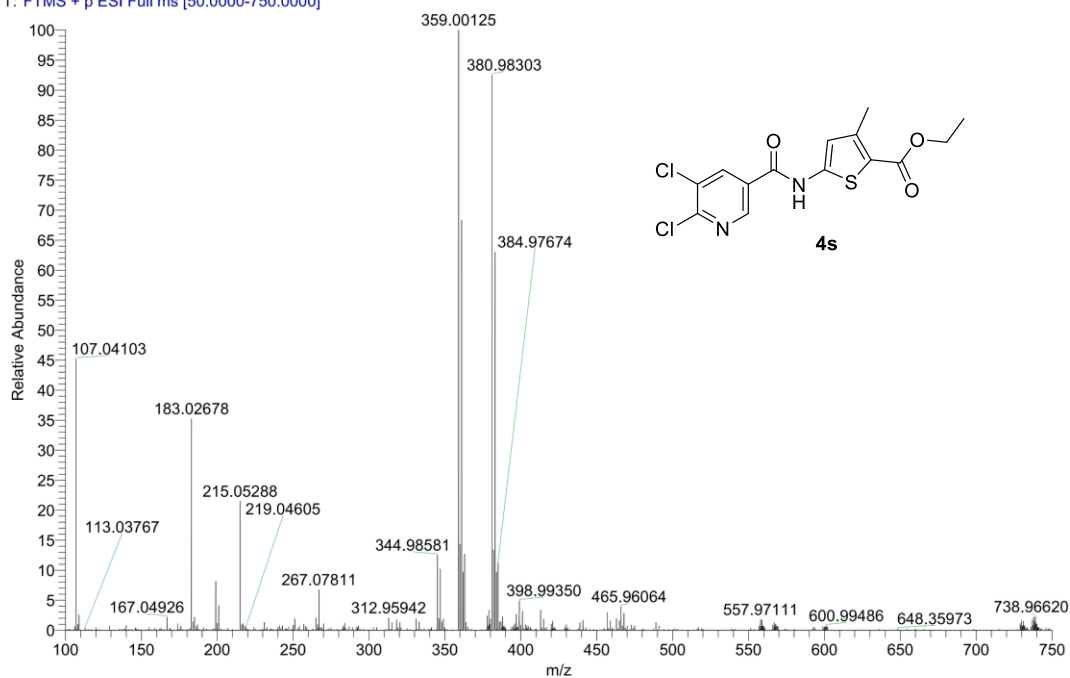

### IR SPECTRAL GRAPH OF COMPOUND 4f

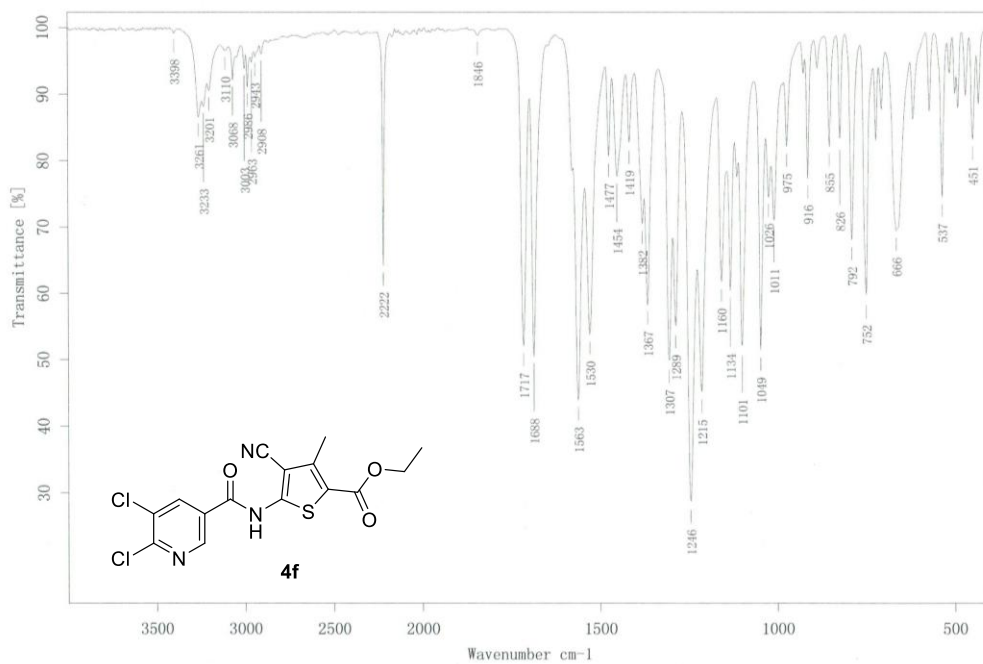

Supplement: s1 [file s1]
